# Supplementary material for: Spatial distribution and determinants of abortion among reproductive age women in Ethiopia, evidence from Ethiopian Demographic and Health Survey 2016 data: Spatial and mixed-effect analysis
Source: PubMed Central journal article supplement (PMC7323954; doi:10.1371/journal.pone.0235382), 2020-06-29

# PLOS ONE

## Spatial distribution and determinants of abortion among reproductive-age women in Ethiopia, Evidence from Ethiopian Demographic and Health Survey (EDHS) 2016 data: Spatial and Mixed-effect analysis

--Manuscript Draft--

|                              |                                                                                                                                                                                                                                                                                                                                                                                                                                                                                                                                                                                                                                                                                                                                                                                                                                                                                                                                                                                                                                                                                                                                                                                                                                                                                                                                                                                                                                                                                                                                                                                                                                                                                                                                                                                                                                                                                                                                                                                                                                                                                                                                                                                                                                                                                                                                                                                                                                                                                                                                                                                                                                                                                                                                                                                                                                                                                                                          |
|------------------------------|--------------------------------------------------------------------------------------------------------------------------------------------------------------------------------------------------------------------------------------------------------------------------------------------------------------------------------------------------------------------------------------------------------------------------------------------------------------------------------------------------------------------------------------------------------------------------------------------------------------------------------------------------------------------------------------------------------------------------------------------------------------------------------------------------------------------------------------------------------------------------------------------------------------------------------------------------------------------------------------------------------------------------------------------------------------------------------------------------------------------------------------------------------------------------------------------------------------------------------------------------------------------------------------------------------------------------------------------------------------------------------------------------------------------------------------------------------------------------------------------------------------------------------------------------------------------------------------------------------------------------------------------------------------------------------------------------------------------------------------------------------------------------------------------------------------------------------------------------------------------------------------------------------------------------------------------------------------------------------------------------------------------------------------------------------------------------------------------------------------------------------------------------------------------------------------------------------------------------------------------------------------------------------------------------------------------------------------------------------------------------------------------------------------------------------------------------------------------------------------------------------------------------------------------------------------------------------------------------------------------------------------------------------------------------------------------------------------------------------------------------------------------------------------------------------------------------------------------------------------------------------------------------------------------------|
| <b>Manuscript Number:</b>    | PONE-D-19-30532                                                                                                                                                                                                                                                                                                                                                                                                                                                                                                                                                                                                                                                                                                                                                                                                                                                                                                                                                                                                                                                                                                                                                                                                                                                                                                                                                                                                                                                                                                                                                                                                                                                                                                                                                                                                                                                                                                                                                                                                                                                                                                                                                                                                                                                                                                                                                                                                                                                                                                                                                                                                                                                                                                                                                                                                                                                                                                          |
| <b>Article Type:</b>         | Research Article                                                                                                                                                                                                                                                                                                                                                                                                                                                                                                                                                                                                                                                                                                                                                                                                                                                                                                                                                                                                                                                                                                                                                                                                                                                                                                                                                                                                                                                                                                                                                                                                                                                                                                                                                                                                                                                                                                                                                                                                                                                                                                                                                                                                                                                                                                                                                                                                                                                                                                                                                                                                                                                                                                                                                                                                                                                                                                         |
| <b>Full Title:</b>           | Spatial distribution and determinants of abortion among reproductive-age women in Ethiopia, Evidence from Ethiopian Demographic and Health Survey (EDHS) 2016 data: Spatial and Mixed-effect analysis                                                                                                                                                                                                                                                                                                                                                                                                                                                                                                                                                                                                                                                                                                                                                                                                                                                                                                                                                                                                                                                                                                                                                                                                                                                                                                                                                                                                                                                                                                                                                                                                                                                                                                                                                                                                                                                                                                                                                                                                                                                                                                                                                                                                                                                                                                                                                                                                                                                                                                                                                                                                                                                                                                                    |
| <b>Short Title:</b>          | Spatial distribution and determinants of abortion among reproductive-age women in Ethiopia                                                                                                                                                                                                                                                                                                                                                                                                                                                                                                                                                                                                                                                                                                                                                                                                                                                                                                                                                                                                                                                                                                                                                                                                                                                                                                                                                                                                                                                                                                                                                                                                                                                                                                                                                                                                                                                                                                                                                                                                                                                                                                                                                                                                                                                                                                                                                                                                                                                                                                                                                                                                                                                                                                                                                                                                                               |
| <b>Corresponding Author:</b> | Getayeneh Antehunegn Tesema, Masters degree<br>University of Gondar College of Medicine and Health Sciences<br>Gondar, Ethiopia ETHIOPIA                                                                                                                                                                                                                                                                                                                                                                                                                                                                                                                                                                                                                                                                                                                                                                                                                                                                                                                                                                                                                                                                                                                                                                                                                                                                                                                                                                                                                                                                                                                                                                                                                                                                                                                                                                                                                                                                                                                                                                                                                                                                                                                                                                                                                                                                                                                                                                                                                                                                                                                                                                                                                                                                                                                                                                                 |
| <b>Keywords:</b>             | Abortion; mixed-effect logistic regression; spatial analysis; Ethiopia                                                                                                                                                                                                                                                                                                                                                                                                                                                                                                                                                                                                                                                                                                                                                                                                                                                                                                                                                                                                                                                                                                                                                                                                                                                                                                                                                                                                                                                                                                                                                                                                                                                                                                                                                                                                                                                                                                                                                                                                                                                                                                                                                                                                                                                                                                                                                                                                                                                                                                                                                                                                                                                                                                                                                                                                                                                   |
| <b>Abstract:</b>             | <p>Background</p> <p>Abortion is the major cause of maternal mortality in developing countries. Despite the efforts made to reduce maternal mortality in the last decades, abortion <del>yet constitutes</del> the highest maternal mortality in Ethiopia. So far, data on spatial distribution and factors determining abortion in the country is limited. This study aimed to explore the spatial pattern and determinants of abortion among women aged 15-49 years in Ethiopia, 2016. Methods</p> <p>Secondary data analysis was conducted based on the 2016 Ethiopian Demographic and Health Survey (EDHS) data. Weighted samples of 12,378 women were included in the study. <del>The</del> Bernoulli model has been fitted using spatial scan statistics version 9.6 to identify hotspot areas and ArcGIS version 10.6 to explore the spatial distribution of abortion. For determinants, a mixed effect logistic regression model that accounts for the hierarchical structure of the data was fitted using STATA version 14. Result</p> <p>The study showed that the prevalence of abortion in Ethiopia was 8.9% [95% CI: 8.4%, 9.5%], which was widely varied across regions ranging from 4.5% in Benishangul to 11.3% in Tigray regions. The spatial distribution of abortion was non-random in Ethiopia. The spatial scan statistics identified a total of 60 significant clusters within 4 spatial windows; of which 19 clusters were primary clusters (most likely clusters). The primary clusters were located in the northern part of the Tigray region (LLR=26.6, <math>p &lt; 0.01</math>; RR=2.63). In the final model of multivariable mixed-effect logistic regression analysis, primary education [AOR=1.36; 95% CI(1.13, 1.64)], rural residence [AOR=4.96; 95%CI(3.42, 7.18)], protestant religion [AOR=0.56; 95%CI: 0.42, 0.75]), richest wealth status [AOR=1.72; 95% CI(1.24, 2.40)], maternal age 24-19 [AOR=2.20; 95%CI(1.27, 3.80)], 30-34 [AOR=3.2; 95%CI(1.82, 5.71)], 35-39 [AOR=3.01; 95%CI(1.67, 5.42)], 40-44 [AOR=4.57; 95%CI(2.47, 8.46)] and 45-49 years (AOR=3.12; 95%CI(1.52, 6.44)], listening radio [AOR=1.27; 95%CI(1.01, 1.60)] and watching TV [AOR=1.45; 95%CI: 1.04, 2.01)] were significantly associated with abortion. Conclusions</p> <p>Abortion spatial distribution among reproductive-age women in Ethiopia was not random, with significant hotspots of higher prevalence of abortion in the northern parts of Tigray, border areas between Oromia and Amhara regional states, border areas between Oromia, and SNNP regions. Maternal education, residence, media exposure, wealth status, and religion were significant predictors. The regions with higher hotspot areas of abortion would better target socioeconomic factors including maternal education, residence, media exposure, wealth status, and religion to curtail the prevalence of abortion.</p> |
| <b>Order of Authors:</b>     | Getayeneh Antehunegn Tesema, Masters degree                                                                                                                                                                                                                                                                                                                                                                                                                                                                                                                                                                                                                                                                                                                                                                                                                                                                                                                                                                                                                                                                                                                                                                                                                                                                                                                                                                                                                                                                                                                                                                                                                                                                                                                                                                                                                                                                                                                                                                                                                                                                                                                                                                                                                                                                                                                                                                                                                                                                                                                                                                                                                                                                                                                                                                                                                                                                              |

|                                                                                                                                                                                                                                                                                                                                                                                                                                                                                                                                                                                                                                                                                                                                                                                                                                                                                                                                                                                                                                                                                                                                                                                                                                                                                                                                                                                     |                                                             |
|-------------------------------------------------------------------------------------------------------------------------------------------------------------------------------------------------------------------------------------------------------------------------------------------------------------------------------------------------------------------------------------------------------------------------------------------------------------------------------------------------------------------------------------------------------------------------------------------------------------------------------------------------------------------------------------------------------------------------------------------------------------------------------------------------------------------------------------------------------------------------------------------------------------------------------------------------------------------------------------------------------------------------------------------------------------------------------------------------------------------------------------------------------------------------------------------------------------------------------------------------------------------------------------------------------------------------------------------------------------------------------------|-------------------------------------------------------------|
|                                                                                                                                                                                                                                                                                                                                                                                                                                                                                                                                                                                                                                                                                                                                                                                                                                                                                                                                                                                                                                                                                                                                                                                                                                                                                                                                                                                     | Tesfaye Hambisa Mekonnen                                    |
|                                                                                                                                                                                                                                                                                                                                                                                                                                                                                                                                                                                                                                                                                                                                                                                                                                                                                                                                                                                                                                                                                                                                                                                                                                                                                                                                                                                     | Achamyeleh Birhanu Teshale                                  |
| <b>Opposed Reviewers:</b>                                                                                                                                                                                                                                                                                                                                                                                                                                                                                                                                                                                                                                                                                                                                                                                                                                                                                                                                                                                                                                                                                                                                                                                                                                                                                                                                                           |                                                             |
| <b>Additional Information:</b>                                                                                                                                                                                                                                                                                                                                                                                                                                                                                                                                                                                                                                                                                                                                                                                                                                                                                                                                                                                                                                                                                                                                                                                                                                                                                                                                                      |                                                             |
| <b>Question</b>                                                                                                                                                                                                                                                                                                                                                                                                                                                                                                                                                                                                                                                                                                                                                                                                                                                                                                                                                                                                                                                                                                                                                                                                                                                                                                                                                                     | <b>Response</b>                                             |
| <p><b>Financial Disclosure</b></p> <p>Enter a financial disclosure statement that describes the sources of funding for the work included in this submission. Review the <a href="#">submission guidelines</a> for detailed requirements. View published research articles from <a href="#">PLOS ONE</a> for specific examples.</p> <p>This statement is required for submission and <b>will appear in the published article</b> if the submission is accepted. Please make sure it is accurate.</p> <p><b>Unfunded studies</b><br/>Enter: <i>The author(s) received no specific funding for this work.</i></p> <p><b>Funded studies</b><br/>Enter a statement with the following details:</p> <ul style="list-style-type: none"> <li>• Initials of the authors who received each award</li> <li>• Grant numbers awarded to each author</li> <li>• The full name of each funder</li> <li>• URL of each funder website</li> <li>• Did the sponsors or funders play any role in the study design, data collection and analysis, decision to publish, or preparation of the manuscript?</li> <li>• <b>NO</b> - Include this sentence at the end of your statement: <i>The funders had no role in study design, data collection and analysis, decision to publish, or preparation of the manuscript.</i></li> <li>• <b>YES</b> - Specify the role(s) played.</li> </ul> <p>* typeset</p> | N/A                                                         |
| <p><b>Competing Interests</b></p> <p>Use the instructions below to enter a competing interest statement for this submission. On behalf of all authors, disclose any <a href="#">competing interests</a> that could be perceived to bias this</p>                                                                                                                                                                                                                                                                                                                                                                                                                                                                                                                                                                                                                                                                                                                                                                                                                                                                                                                                                                                                                                                                                                                                    | The authors have declared that no competing interests exist |

work—acknowledging all financial support and any other relevant financial or non-financial competing interests.

This statement **will appear in the published article** if the submission is accepted. Please make sure it is accurate. View published research articles from [PLOS ONE](#) for specific examples.

**NO authors have competing interests**

Enter: *The authors have declared that no competing interests exist.*

**Authors with competing interests**

Enter competing interest details beginning with this statement:

*I have read the journal's policy and the authors of this manuscript have the following competing interests: [insert competing interests here]*

\* typeset

**Ethics Statement**

Enter an ethics statement for this submission. This statement is required if the study involved:

- Human participants
- Human specimens or tissue
- Vertebrate animals or cephalopods
- Vertebrate embryos or tissues
- Field research

Write "N/A" if the submission does not require an ethics statement.

General guidance is provided below. Consult the [submission guidelines](#) for detailed instructions. **Make sure that all information entered here is included in the Methods section of the manuscript.**

N/A

**Format for specific study types**

**Human Subject Research (involving human participants and/or tissue)**

- Give the name of the institutional review board or ethics committee that approved the study
- Include the approval number and/or a statement indicating approval of this research
- Indicate the form of consent obtained (written/oral) or the reason that consent was not obtained (e.g. the data were analyzed anonymously)

**Animal Research (involving vertebrate animals, embryos or tissues)**

- Provide the name of the Institutional Animal Care and Use Committee (IACUC) or other relevant ethics board that reviewed the study protocol, and indicate whether they approved this research or granted a formal waiver of ethical approval
- Include an approval number if one was obtained
- If the study involved *non-human primates*, add *additional details* about animal welfare and steps taken to ameliorate suffering
- If anesthesia, euthanasia, or any kind of animal sacrifice is part of the study, include briefly which substances and/or methods were applied

**Field Research**

Include the following details if this study involves the collection of plant, animal, or other materials from a natural setting:

- Field permit number
- Name of the institution or relevant body that granted permission

**Data Availability**

Authors are required to make all data underlying the findings described fully available, without restriction, and from the time of publication. PLOS allows rare exceptions to address legal and ethical concerns. See the [PLOS Data Policy](#) and [FAQ](#) for detailed information.

Yes - all data are fully available without restriction

A Data Availability Statement describing where the data can be found is required at submission. Your answers to this question constitute the Data Availability Statement and **will be published in the article**, if accepted.

**Important:** Stating 'data available on request from the author' is not sufficient. If your data are only available upon request, select 'No' for the first question and explain your exceptional situation in the text box.

Do the authors confirm that all data underlying the findings described in their manuscript are fully available without restriction?

**Describe where the data may be found in full sentences. If you are copying our sample text, replace any instances of XXX with the appropriate details.**

- If the data are **held or will be held in a public repository**, include URLs, accession numbers or DOIs. If this information will only be available after acceptance, indicate this by ticking the box below. For example: *All XXX files are available from the XXX database (accession number(s) XXX, XXX).*
- If the data are all contained **within the manuscript and/or Supporting Information files**, enter the following: *All relevant data are within the manuscript and its Supporting Information files.*
- If neither of these applies but you are able to provide **details of access elsewhere**, with or without limitations, please do so. For example:

*Data cannot be shared publicly because of [XXX]. Data are available from the XXX Institutional Data Access / Ethics Committee (contact via XXX) for researchers who meet the criteria for access to confidential data.*

*The data underlying the results presented in the study are available from (include the name of the third party*

the data available from dhs data bases

|                                                                                                                                                                                                                                         |  |
|-----------------------------------------------------------------------------------------------------------------------------------------------------------------------------------------------------------------------------------------|--|
| <p><i>and contact information or URL).</i></p> <ul style="list-style-type: none"><li>• This text is appropriate if the data are owned by a third party and authors do not have permission to share the data.</li></ul> <p>* typeset</p> |  |
| Additional data availability information:                                                                                                                                                                                               |  |

Date: 1 November 2019

To: PLOS ONE Journal editors

Subject: **Manuscript submission for peer review and publication**

Dear Editor-in-Chief,

Please find enclosed our manuscript, "*Spatial distribution and determinants of abortion among reproductive-age women in Ethiopia, Evidence from Ethiopian Demographic and Health Survey (EDHS) 2016 data: Spatial and Mixed-effect analysis*" by Getayeneh Antehunegn Tesema, Tesfaye Hambisa Mekonnen, and Achamyeleh Birhanu Teshale, which we would like to submit for publication as an original research in PLOS ONE. To our knowledge, this is the first report showing *spatial distribution and determinants of abortion among reproductive-age women in Ethiopia, Evidence from Ethiopian Demographic and Health Survey (EDHS) 2016 data: Spatial and Mixed-effect analysis in Ethiopia*. We believe our findings would appeal to the readership of PLOS ONE. We confirm that this manuscript has not been published elsewhere and is not under consideration by another journal. All authors have approved the manuscript and agree with its submission to PLOS ONE.

We look forward to hearing from you at your earliest convenience.

With best regards,

Sincerely yours,

Getayeneh Antehunegn Tesema

Correspondence

Email address: [getayenehantehunegn@gmail.com](mailto:getayenehantehunegn@gmail.com)

Gondar, Ethiopia

1 Spatial distribution and determinants of abortion among reproductive-age women  
2 in Ethiopia, Evidence from Ethiopian Demographic and Health Survey (EDHS)  
3 2016 data: Spatial and Mixed-effect analysis

4 Getayeneh Antehunegn Tesema<sup>1\*</sup>, Tesfaye Hambisa Mekonnen<sup>2</sup>, Achamyeleh Birhanu Teshale<sup>1</sup>

5 **Affiliations:**

6 <sup>1</sup>Department of Epidemiology and Biostatistics, Institute of Public Health, College of Medicine  
7 and Health Sciences, University of Gondar, Gondar, Ethiopia

8 <sup>2</sup>Department of Environmental and Occupational Health and Safety, Institute of Public Health,  
9 College of Medicine and Health Sciences, University of Gondar, Gondar, Ethiopia

10

11

12 **Email addresses:**

13 Getayeneh Antehunegn Tesema: [getayenehantehunegn@gmail.com](mailto:getayenehantehunegn@gmail.com)

14 Tesfaye Hambisa Mekonnen: [tajan2022@gmail.com](mailto:tajan2022@gmail.com)

15 Achamyeleh Birhanu Teshale: [achambir08@gmail.com](mailto:achambir08@gmail.com)

16

17

18 \*Correspondence

19

20

21

22

23



## 24 ABSTRACT

25 **Background:** Abortion is the major cause of maternal mortality in developing countries. Despite  
26 the efforts made to reduce maternal mortality in the last decades, abortion yet constitutes the  
27 highest maternal mortality in Ethiopia. So far, data on spatial distribution and factors  
28 determining abortion in the country is limited. This study aimed to explore the spatial pattern  
29 and determinants of abortion among women aged 15-49 years in Ethiopia, 2016.

30 **Methods:** Secondary data analysis was conducted based on the 2016 Ethiopian Demographic  
31 and Health Survey (EDHS) data. Weighted samples of 12,378 women were included in the  
32 study. The Bernoulli model has been fitted using spatial scan statistics version 9.6 to identify  
33 hotspot areas and ArcGIS version 10.6 to explore the spatial distribution of abortion. For  
34 determinants, a mixed effect logistic regression model that accounts for the hierarchical structure  
35 of the data was fitted using STATA version 14.

36 **Result:** The study showed that the prevalence of abortion in Ethiopia was 8.9% [95% CI: 8.4%,  
37 9.5%], which was widely varied across regions ranging from 4.5% in Benishangul to 11.3% in  
38 Tigray regions. The spatial distribution of abortion was non-random in Ethiopia. The spatial scan  
39 statistics identified a total of 60 significant clusters within 4 spatial windows; of which 19  
40 clusters were primary clusters (most likely clusters). The primary clusters were located in the  
41 northern part of the Tigray region (LLR=26.6,  $p < 0.01$ ; RR=2.63). In the final model of  
42 multivariable mixed-effect logistic regression analysis, primary education [AOR=1.36; 95% CI(  
43 1.13, 1.64)], rural residence [AOR=4.96; 95%CI( 3.42, 7.18)], protestant religion [AOR=0.56;  
44 95%CI: 0.42, 0.75)], richest wealth status [AOR=1.72; 95% CI( 1.24, 2.40)], maternal age 24-19  
45 [AOR=2.20; 95%CI(1.27, 3.80)], 30-34 [AOR=3.2; 95%CI( 1.82, 5.71)], 35-39 [AOR=3.01;  
46 95%CI( 1.67, 5.42)], 40-44 [AOR=4.57; 95%CI(2.47, 8.46)] and 45-49 years (AOR=3.12;  
47 95%CI( 1.52, 6.44)], listening radio [AOR=1.27; 95%CI( 1.01, 1.60)] and watching TV  
48 [AOR=1.45; 95%CI: 1.04, 2.01)] were significantly associated with abortion.

49 **Conclusions:** Abortion spatial distribution among reproductive-age women in Ethiopia was not  
50 random, with significant hotspots of higher prevalence of abortion in the northern parts of  
51 Tigray, border areas between Oromia and Amhara regional states, border areas between Oromia,

52 and SNNP regions. Maternal education, residence, media exposure, wealth status, and religion  
53 were significant predictors. The regions with higher hotspot areas of abortion would better target  
54 socioeconomic factors including maternal education, residence, media exposure, wealth status,  
55 and religion to curtail the prevalence of abortion.

56 **Keywords:** Abortion, mixed-effect logistic regression, spatial analysis, Ethiopia

57

58

59

## 60 **Introduction**

61 Abortion is defined as the loss of product of conception before the fetus surviving out of **uretro**  
62 (before 28 completed weeks of gestation) whether induced or spontaneous with its outcome safe  
63 or unsafe (1, 2). It is the major cause of maternal mortality among reproductive-age women (3).  
64 Annually, over 55.9 million abortions occur worldwide with 49.3 million in developing and 6.6  
65 million in developed regions (4). Globally, abortion accounts for 13% of all maternal mortality  
66 (5), representing 200,000 maternal deaths and 5 million disabilities annually (6, 7). The majority  
67 of abortion-related mortality and morbidity can be prevented through education on sexual  
68 behavior, family planning and provision of safe abortion (8).

69 Abortion remains a serious public health concern(4) mainly in developing countries where  
70 unintended pregnancies often result from ineffective use or nonuse of contraceptives (9). The  
71 rate of abortion varies across countries, ranging from 31 per 1,000 women of reproductive age in  
72 western Africa to 38 per 1,000 in northern Africa rates in Eastern, Middle, and Southern Africa  
73 is close to the regional average of 34 per 1,000 (10, 11).

74 The rate of abortion has ~~been~~ declined in developed nations where the liberalization of abortion  
75 law and safe abortion service is legally available (12, 13). The prevalence however remains high  
76 in developing countries particularly Sub-Saharan Africa (SSA) where abortion is legally highly  
77 restricted (14-16).

78 Prior studies have documented that abortion has been an important and ongoing health problem  
79 in Ethiopia. In 2008, an estimated 382,000 induced abortions were performed and 52,600 women  
80 were treated for the complication of unsafe abortion with the prevalence of abortion of 13% (6).  
81 Ethiopian Demographic and Health Survey (EDHS) 2016 report estimates that 412 women died  
82 of pregnancy-related causes for every 100,000 live births in the five years before the survey(17).  
83 A study conducted in Southern Ethiopia showed that the prevalence of abortion mainly related to  
84 unwanted pregnancies was 12.3% (18).

85 Different studies done on abortion showed that rural residence, parity, educational status, mode  
86 of delivery, antenatal care (ANC) utilization, and place of delivery, maternal nutritional status,  
87 and maternal obstetric factors were the significant predictors of abortion (19-21).

88 There is a wide gap in abortion not only among different countries but also within the country  
89 (22). A high rate of stillbirth has been reported among rural, poor and marginalized societies that  
90 are the least beneficial of maternal health promotion activities and services(23, 24). Thus, the  
91 identification of geographic areas with a high rate of abortion using Geographic Information  
92 System (GIS) and Spatial Scan statistical analysis (SaTScan) has become fundamental to guide  
93 targeted public health interventions (25).

94 Although abortion is an acute public health problem in SSA including Ethiopia (26),  
95 information is scant on the spatial distribution and its determinant factors and few available data  
96 is not nationally representative. Hence, this study explored the spatial pattern and determinants  
97 of abortion among reproductive-age women in Ethiopia using the 2016 EDHS data. As abortion  
98 and abortion-related mortality is availability and quality indicator of maternal health services  
99 (27), understanding the significant hotspot areas of abortion is essential to evaluate the quality of  
100 service and improve access to maternal health services that in turn reduces maternal mortality.

## 101 **Method and materials**

### 102 **Study design, setting and period**

103 A community-based cross-sectional study was conducted from January 18 to June 27, 2016. The  
104 study was conducted in Ethiopia, which is situated in the Horn of Africa. The country has 9  
105 National Regional States including Afar, Amhara, Benishangul-Gumuz, Gambela, Harari,  
106 Oromia, Somali, Southern Nations, Nationalities, and People's (SNNP) Region and Tigray and  
107 two Administrative cities (Addis Ababa and Dire-Dawa) (**Figure 1**). Ethiopia is an agrarian  
108 country and agriculture accounts for 43% of the gross domestic product (GDP) and 84% of the  
109 population lives in rural areas. More than 80% of the country's total population lives in the  
110 regional states of Amhara, Oromia, and SNNP (28).

111 In 2016, the total population was 102 million of which 43.47% of the population ages less than 14  
112 years with a birth rate of 36.5 births per 1000 populations and fertility rate of 4.46. Ethiopia is  
113 the 13th in the world and 2nd in Africa most populous country Ethiopia has 3 tiers health  
114 systems, Primary health care unit (Primary hospital, health center, health post, primary clinic,  
115 and medium clinic); Secondary health care (General hospital, specialty clinics and specialty  
116 centers); and Tertiary health care (Specialized hospital). The number of hospitals varies from

117 region to region in response to differences in population size. The most populous region, Oromia  
118 has 30 hospitals. The other two predominant regions Amhara and SNNP have 19 and 20  
119 respectively with Tigray in fourth place with 16 hospitals, Gambela has only one hospital and  
120 Benishangul-Gumuz two had two hospitals (29).

## 121 **Sample and population**

122 The source population was all reproductive-age women within five years before the survey in  
123 Ethiopia and all women from reproductive-age women in the selected enumeration areas within  
124 five years before the survey were the study population. The EDHS used a stratified two-stage  
125 cluster sampling technique selected in two stages using the 2007 Population and Housing Census  
126 as a sampling frame. Stratification was achieved by separating each region into urban and rural  
127 areas. In total, 21 sampling strata have been created because the Addis Ababa region is entirely  
128 urban. In the first stage, 645 enumeration areas (EAs) (202 in the urban area) were selected with  
129 probability proportional to the EA size and with independent selection in each sampling stratum.  
130 In the second stage, because the time has passed since the population and housing census, a  
131 complete household listing operation was carried out in all selected EAs before the start of  
132 fieldwork and on average 28 households were systematically selected. Of these, 18,008  
133 households and 16,583 eligible women included. The detailed sampling procedure was presented  
134 in the full EDHS 2016 report (30).

## 135 **Variables and data collection procedure**

136 The dependent variables used for the study was “pregnancy termination” or “abortion” which  
137 was derived from the EDHS question “have you ever had a terminated pregnancy” and then we  
138 extract terminated pregnancy within 5 years preceding the survey and the outcome variable was  
139 coded as 0= “No”, if women didn’t have terminated pregnancy within the study period, and as  
140 1= “yes” if a women had pregnancy termination (abortion). The independent factors were  
141 maternal age, residence, educational status, marital status, religion, and frequency of watching  
142 television, frequency of listening radio, wealth status, and birth history.

143 The study was conducted based on EDHS data by accessing from the DHS program official  
144 database [www.measuredhs.com](http://www.measuredhs.com) after permission was granted through an online request by

145 explaining the objective of the study. A structured and pre-tested questionnaire was used as a  
146 tool for data collection. The raw data was collected from all parts of the country on childbearing  
147 aged women. We used the EDHS 2016 birth data set and extracted the outcome and independent  
148 variables. Geographic coordinate data (longitude and latitude coordinates) was taken at the  
149 cluster level/ enumeration area level after we explain the purpose of conducting the spatial  
150 distribution of abortion.

## 151 **Data management and analysis**

152 Before the actual data collection, data collectors were trained and a pretest was conducted.  
153 Interviews were performed using three local languages (Amharic, Tigrigna and Afaan Oromo).  
154 The data were weighted using sampling weight, primary sampling unit, and strata before any  
155 statistical analysis to restore the representativeness of the survey and to ~~tell the STATA to~~ take  
156 ~~into account the~~ sampling design when calculating standard errors to get reliable statistical  
157 estimates. Cross tabulations and summary statistics were done using STATA version 14  
158 software. In EDHS data, the data structure is hierarchical nature, women are nested within a  
159 cluster and we expect that women within the same cluster may be more similar to each other than  
160 women in the rest of the country. This violates the assumption of the traditional regression model  
161 which is the independence of observations and equal variance across clusters. It implies that the  
162 need to take into account the between cluster variability by using advanced model. Therefore, a  
163 mixed effect logistic regression model (both fixed and random effect) was fitted. Since the  
164 outcome variable was binary standard logistic regression and Generalized Linear Mixed Models  
165 (GLMM) were fitted. Model comparison was done based on Intra-Class Correlation Coefficient  
166 (ICC), Likelihood Ratio (LR) test, Akaike Information Criteria (AIC), Deviance and Bayesian  
167 Information Criteria (BIC) values. The model with the lowest deviance was chosen since the  
168 model is a nested model. Variables with  $<0.2$  p-values in the bi-variable analysis were  
169 considered in the multivariable mixed-effect logistic regression model. Adjusted Odds Ratio  
170 (AOR) with a 95% Confidence Interval (CI) and p-value  $<0.05$  in the multivariable model were  
171 used to declare significant association with abortion. The goodness of fit was assessed using  
172 deviance, LR test, and ICC.

173

## 174 **Spatial analysis**

175 For the spatial analysis ArcGIS version 10.6 software and SaTScan version 9.6 software have  
176 been used.

## 177 **Spatial autocorrelation analysis**

178 The spatial autocorrelation (Global Moran's I) statistic measures whether abortion patterns were  
179 dispersed, clustered or randomly distributed in the study area (31). ~~Moran's I is a spatial statistics~~  
180 ~~used to measure spatial autocorrelation by taking the entire data set and produce a single output~~  
181 ~~value which ranges from -1 to +1. Moran's I Values close to -1 indicate disease dispersed,~~  
182 ~~whereas Moran's I close to +1 indicate disease clustered and disease distributed randomly if I~~  
183 ~~value is zero.~~ A statistically significant Moran's I ( $p < 0.05$ ) leads to rejection of the null  
184 hypothesis (abortion is randomly distributed) and indicates the presence of spatial  
185 autocorrelation.

## 186 **Hot spot analysis (Getis-OrdGi\* statistic)**

187 Getis-OrdGi\* statistics were computed to measure how spatial autocorrelation varies over the  
188 study location by calculating GI\* statistic for each area. Z-score is computed to determine the  
189 statistical significance of clustering, and the p-value computed for the significance. Statistical  
190 output with high GI\* indicates "hotspot" whereas low GI\* means a "cold spot"(32).

## 191 **Spatial interpolation**

192 It is very expensive and laborious to collect reliable data in all areas of the country to know the  
193 burden of a certain event. Therefore, part of a certain area can be predicted by using observed  
194 data using a method called interpolation. The spatial interpolation technique is used to predict  
195 abortion on the un-sampled areas in the country based on sampled EAs. There are various  
196 deterministic and geostatistical interpolation methods. Among all of the methods, ordinary  
197 Kriging and empirical Bayesian Kriging are considered the best method since it incorporates the  
198 spatial autocorrelation and it statistically optimizes the weight(33). Ordinary Kriging spatial

199 interpolation method was used for this study for predictions of abortion in unobserved areas of  
200 Ethiopia.

### 201 **Spatial scan statistical analysis**

202 Spatial scan statistical analysis Bernoulli based model was employed to test for the presence of  
203 statistically significant spatial clusters of abortion using Kuldorff's SaTScan version 9.6  
204 software. The spatial scan statistic uses a circular scanning window that moves across the study  
205 area. Women having pregnancy termination were taken as cases and those who have not as  
206 controls to fit the Bernoulli model. The numbers of cases in each location had Bernoulli  
207 distribution and the model required data for cases, controls, and geographic coordinates. The  
208 default maximum spatial cluster size of <50% of the population was used, as an upper limit,  
209 which allowed both small and large clusters to be detected and ignored clusters that contained  
210 more than the maximum limit.

211 For each potential cluster, a likelihood ratio test statistic and the p-value was used to determine if  
212 the number of observed abortion within the potential cluster was significantly higher than  
213 expected or not. The scanning window with maximum likelihood was the most likely performing  
214 cluster, and the p-value was assigned to each cluster using Monte Carlo hypothesis testing by  
215 comparing the rank of the maximum likelihood from the real data with the maximum likelihood  
216 from the random datasets. The primary and secondary clusters were identified and assigned p-  
217 values and ranked based on their likelihood ratio test, based on 999 Monte Carlo  
218 replications(34).

### 219 **Ethics approval and consent to participate**

220 Permission to get access to the data was obtained from the measure DHS program online request  
221 from <http://www.dhsprogram.com.website> and the data used were publicly available with no  
222 personal identifier.

223

224

225



## 226 **Result**

### 227 **Socio-demographic characteristics of respondents**

228 A total of 15,683 women were included in the 2016 EDHS survey. Of these, a weighted sample  
229 of 12,378 women was included in this study. Of these, 89% (N=11,048) were rural residents and  
230 44.1% (N=5,457) lived in Oromia region. Regarding educational status, 66.8% (N=8,267) stated  
231 they had no formal education. The median age of women was 29 years (IQR± 9 years). In terms  
232 of marital status, 93.7% (N=11,595) of respondents were married (Table 1).

### 233 **Obstetric and socioeconomic characteristics of respondents**

234 Less than half 44.4% (N=5,495) of the respondents had four and above birth and 23.9%  
235 (N=2,969) of women were from the poorest household. Concerning listening to the radio, about  
236 73.6% (N=9,111) of respondents never listened to the radio (Table 2).

### 237 **The prevalence of abortion among women in Ethiopia, 2016**

238 The result revealed that about 8.9% (N=1,105) [95% CI (8.4%-9.5%)] of the respondents in  
239 Ethiopia reported had pregnancy termination. The study reported that about 9.2% (N=1,016) of  
240 rural residents and 6.7% (N=89) of urban residents ever had a pregnancy terminated. The  
241 prevalence of abortion varies across regions ranging from 4.5% (N=6) in Benishangul-gumuz to  
242 11.3% (N=89) in the Tigray region (Figure 2).

### 243 **Spatial distribution of abortion**

244 Each point on the map represents one census enumeration area which encompasses several  
245 abortion cases. The red color indicates areas with a high prevalence of abortion, whereas the  
246 green one indicates a low prevalence of abortion. In this study, the high prevalence of abortion  
247 was found in the Central and Northern Tigray, West Afar, East Benishangul-Gumuz, and East  
248 Southern Nation Nationalities and peoples (SNNPRs). High prevalence of abortion found in the  
249 Gambella, West Benishangul-Gumuz, central Oromia, Harari and Dire Dawa (Figure 3).

250 The result showed that the spatial distribution of abortion among reproductive-age women was  
251 nonrandom with Global Moran's Index that the spatial distribution of ARI among under-five

252 children was nonrandom with Global Moran's I 0.06 ( $p < 0.001$ ). The clustered patterns (on the  
253 right sides) showed that high rates of abortion occurred across the country. A z-score 3.54  
254 indicated that there was less than 1% likelihood for this clustered pattern to be the result of a  
255 random chance. The bright red and blue colors at the end tails indicated an increased significance  
256 level (Figure 4).

### 257 **Hotspot analysis of abortion**

258 The hotspot analysis using Getis-OrdGi\* statistic revealed that significant hot spot areas (area  
259 with high abortion rate) were identified in most parts of Tigray, Addis Ababa, South Amhara and  
260 West SNNPRs regions whereas significant cold spot areas were detected in most parts of  
261 Gambella and Benishangul-Gumuz regions (Figure 5).

### 262 **Kriging Interpolation of Abortion**

263 Based on EDHS 2016 sampled data, the Kriging interpolation technique predict that the highest  
264 abortion rate was detected in Northern Tigray, Addis Ababa, Southwest Oromia, Southwest  
265 SNNPRs and Northern Afar. In contrast, the relatively low abortion rate was detected in  
266 Gambella, South Amhara, and West Benishangul-Gumuz and the Eastern part of Afar regions  
267 (Figure 6).

### 268 **Spatial Scan Statistical analysis**

269 A total of 60 significant clusters within 4 spatial windows were identified at which 19 clusters  
270 were primary (most likely clusters). The primary clusters were located in the Northern part of the  
271 Tigray region. Which were centered at 14.175601 N, 38.891649 E with 62.42 km radius, a  
272 Relative Risk (RR) of 2.63, and Log-Likelihood Ratio (LRR) of 26.6, at  $p$ -value  $< 0.01$ . It showed  
273 that women within the spatial window had 2.63 times higher risk for abortion as compared to  
274 women outside the spatial window (Table 3). Whereas, the secondary clusters were located in  
275 border areas between Oromia and Amhara, southeast Oromia and border areas between SNNPRs  
276 and Oromia regions. The bright red color circular window (Rings) indicates that the most  
277 statistically significant spatial window contains primary clusters of abortion (Figure 7). There  
278 was a higher risk of abortion within the window than outside the window.

## 279 **Determinants of abortion**

280 **Model comparison:** AIC, BIC, and Deviance were checked, and the mixed effect logistic  
281 regression model was chosen because of the smallest value of Deviance since the model was  
282 nested model (Table 4). Furthermore, the ICC value was 0.21(0.17, 0.26) and the Log-likelihood  
283 ratio test was ( $\chi^2(01) = 238.49$  Prob  $\geq \chi^2 = 0.0000$ ) which informed us to choose  
284 Mixed effect logistic regression model (GLMM) over the basic model.

285 In the mixed-effect logistic regression model, maternal age, religion, residence, wealth status,  
286 educational status, frequency of watching television, frequency of listening radio, birth history,  
287 and marital status showed a significant association in the bi-variable analysis and were  
288 considered for multivariable analysis.

289 However, in the multivariable mixed-effect logistic regression analysis, educational status,  
290 maternal age, frequency of watching television, frequency of listening radio, and religion have  
291 remained statistically significant.

292 The odds of experiencing abortion were nearly 5 times [AOR=4.96, 95%CI (3.42, 7.18)] in rural  
293 resident women as compared to urban women. Protestant religious followers had 44 %  
294 [AOR=0.56, 95%CI (0.42, 0.75)] decreased odds of having an abortion as compared to orthodox  
295 Christians.

296 The odds of experiencing abortion were 2.2 [AOR=2.20; 95%CI(1.27, 3.80)], [AOR=3.2;  
297 95%CI(1.82, 5.71)], [AOR=3.01; 95%CI(1.67, 5.42)], [AOR=4.57;95%CI(2.47, 8.46)],  
298 [AOR=3.12; 95%CI(1.52, 6.44)] times higher among women in the age group 24-29, 30-34, 35-  
299 39, 40-44 and 45 -49 years as compared to women 15-19 years old. The likelihood of  
300 experiencing abortion among women with primary education was 1.36 times higher than among  
301 women with no education [AOR=1.36; 95%CI (1.13, 1.64)]. Women with the richest wealth  
302 index were 1.72 times higher chance of abortion as compared to women with the poorest wealth  
303 status [AOR=1.72; 95% CI(1.24, 2.40)].

304 The odds of having abortion among women who listened to the radio less than once a week were  
305 1.27 times higher than women who never listened to the radio (AOR=1.27, CI: 1.01, 1.60).  
306 Women who watched television at least once a week were 1.45 times more likely to had an

307 abortion as compared to women who never watched the television [AOR=1.45 95%CI (1.04,  
308 2.01)] (Table 5).

## 309 **Discussion**

310 Exploring the spatial distribution of abortion is crucial to identify aggregations of abortion cases  
311 to target public health interventions.

312 The current investigation revealed that the prevalence of abortion in Ethiopia was 8.9 % with  
313 significant spatial variability. The finding indicates that abortion is a public health problem in  
314 Ethiopia (35). The spatial scan statistics detected a total of four statistically significant SaTScan  
315 clusters of areas with a high prevalence of abortion. In multivariable mixed-effect logistic  
316 regression analysis, wealth status, maternal education, religion, media exposure, and maternal  
317 age were significantly associated with experiencing abortion.

318 The current finding was consistent with national based study in Mozambique (9.0%) (36) but  
319 lower than the national level study in and Ghana (25%) (36) and northwest Ethiopia (19%) (37).  
320 This might be attributed to the difference in the study period and improvement in the quality of  
321 data to date. It was found to be higher than those of studies done in India (1.7%) (38) and  
322 Wolayita-sodo, Ethiopia (6.5%) (39). The difference might be due to the difference in the study  
323 population. The current investigation was conducted at the national level (community-based)  
324 based on EDHS 2016 which is supposed nationally representative while the study in Wolayita-  
325 sodo was conducted among university students (facility-based).

326 This study demonstrated that abortion had statistically significant geographic variation which  
327 was non-randomly distributed. From the 2016 EDHS data SaTScan analysis, the most likely  
328 primary SaTScan clusters (hotspot) areas were detected in the northern part of the Tigray region  
329 whereas the secondary clusters were detected in border areas of Oromia, Amhara, and SNNP.  
330 The spatial variation might be related to the difference in socioeconomic status and health  
331 inequality within the country. There is a gap in health service utilization like family planning,  
332 ANC and other reproductive health services across regions (40).

333 The mixed-effect logistic regression analysis revealed that terminating pregnancy among women  
334 was significantly associated with the place of residence. Women residing in rural areas were

335 more likely to experience abortion as compared to urban residents. This finding was consistent  
336 with a study done in northwest Ethiopia (37) and India (38). This might be due to lack of access  
337 to abortion services, and limited information about abortion due to lack of access to media in the  
338 urban areas (41).

339 Maternal age was found to be significantly associated with experiencing abortion. Women in the  
340 age group 25-29, 30-34, 35-39, 40-44, and 45-49 years were more likely to experience abortion  
341 than women in the age group 15-19. This was consistent with findings in Ghana (36), Denmark  
342 (42) and Mozambique (36). The possible explanation could be that older women are more likely  
343 to have medical and pregnancy-related complications like high blood pressure (HTN), Diabetic  
344 Mellitus (DM), cardiovascular diseases and chromosomal abnormality that can complicate the  
345 pregnancy and increase the risk of poor pregnancy outcome (43). When these complications are  
346 not well controlled, it can contribute to miscarriage, intra uterine growth restriction (IUGR) and  
347 birth defects such as neural tube defect, Down syndrome, anencephaly and as maternal age  
348 increases the risk of chromosomal abnormality increased, decreased uterine and hormonal  
349 function (44).

350 We found experiencing abortion was importantly related to access to media exposure (televisions  
351 and radio) as compared to women who had no access to media. This result agrees with reports in  
352 Ghana and Mozambique (36). The possible reason might be that since media is an important  
353 mechanism in providing information about how and where to terminate a pregnancy.  
354 Furthermore, women who have media exposure might be aware of available laws related to  
355 abortion and less likely to be stigmatized by society (45).

356 The study also showed that the likelihood of experiencing abortion among protestant religious  
357 followers was lower as compared to those women who are orthodox Christians. This was  
358 consistent with a study in China (46). This might be due to lack of access to reproductive health  
359 services like abortion services, lack of awareness, cultural and religious belief since orthodox  
360 religious followers had deep-rooted belief towards abortion they belief as sinning (46).  
361 Regarding wealth status, the richest women had higher odds of experiencing abortion as  
362 compared to the poorest women. This was similar to a study in Ghana (47) and Nepal (48). The  
363 probable reason might be that the wealth status of women can determine their ability to cover the  
364 cost of health care services and also poor women faced cost barriers like transportation costs

365 since the abortion services did not perform elsewhere, this can impede women to have an  
366 abortion.

367 Maternal education was a significant predictor of experiencing abortion. It showed that women  
368 with primary education were highly likely to experience abortion as compared to women with no  
369 education. This was consistent prior study conducted in northwest Ethiopia(37), and India (38),  
370 could be due to the reason that educated women didn't need to give birth to meet the demands  
371 of ongoing education, to postpone birth interval in order to improve pregnancy outcome and the  
372 educated women had information and access to the abortion services. The strength of this study  
373 was that it was based on weighted large, nationally representative data. The study is done using  
374 an advanced model to take into account the clustering effect (mixed-effect logistic regression) to  
375 get reliable standard error and estimate. However, the study finding is interpreted in light of  
376 limitations. First, as with other cross-sectional studies, the temporal relationship can't be  
377 established. Second, since data was collected from self-report from respondents there may be a  
378 possibility of social desirability bias since abortion is a sensitive issue can lead to under ported.

### 379 **Conclusions**

380 The finding of this study helps to fill the gap in the spatial distribution and determinant factors  
381 with abortion at the national level. The study showed that there was significant spatial variation  
382 within Ethiopia and maternal education, wealth status, media exposure, and religion were  
383 significant factors associated with abortion. We recommend that the health sectors, NGOs and  
384 the government strengthen the effort towards reproductive health services like family planning  
385 services particularly for rural residents and should design effective public health interventions in  
386 the identified hotspot areas to reduce the incidence of abortion and abortion-related mortality.  
387 Besides, we recommend scholars to examine the reason that abortion had significant geographic  
388 variation within the countries using a detail exploration like qualitative study.

### 389 **Abbreviations**

390 AIC=Akaike information criteria; AOR=adjusted odds ratio; AOR=Adjusted odds ratio;  
391 BIC=Bayesian information criterion; CI=confidence interval; COR=crude odds ratio;  
392 DHS=Demographic health survey; DM=diabetic mellitus; EAs=Enumeration areas;

393 EDHS=Ethiopian demographic and health survey; GLMM=Generalized linear mixed model;  
394 HTN=Hypertension; ICC=Intra cluster correlation coefficient; IUGR=Intra uterine growth  
395 restriction; LLR=Log likelihood ratio; LR=Likelihood ratio; RR=Relative risk; SNNP=Southern  
396 nations and nationalities of people; SSA=Sub-Saharan Africa

#### 397 **Availability of data and materials**

398 Data is available online and you can access it from [www.measuredhs.com](http://www.measuredhs.com).

#### 399 **Competing Interests**

400 Authors declare that they have no conflict of interest

#### 401 **Funding**

402 No funding was obtained for this study.

#### 403 **Authors' contribution**

404 Conceptualization: Getayeneh Antehunegn Tesema, Tesfaye Hambisa Mekonnen, Achamyeleh  
405 Birhanu Teshale

406 Data curation: Getayeneh Antehunegn Tesema, Tesfaye Hambisa Mekonnen, Achamyeleh  
407 Birhanu Teshale

408 Investigation: Getayeneh Antehunegn Tesema, Tesfaye Hambisa Mekonnen, Achamyeleh  
409 Birhanu Teshale

410 Methodology: Getayeneh Antehunegn Tesema, Tesfaye Hambisa Mekonnen, Achamyeleh  
411 Birhanu Teshale

412 Software: Getayeneh Antehunegn Tesema, Tesfaye Hambisa Mekonnen, Achamyeleh Birhanu  
413 Teshale

414 Validation: Getayeneh Antehunegn Tesema, Tesfaye Hambisa Mekonnen, Achamyeleh Birhanu  
415 Teshale

416 Writing: Getayeneh Antehunegn Tesema, Tesfaye Hambisa Mekonnen, Achamyeleh Birhanu  
417 Teshale

418 Writing – review and editing: Getayeneh Antehunegn Tesema, Tesfaye Hambisa Mekonnen,  
419 Achamyeleh Birhanu Teshale

420

421 **Consent for publication**

422 Not applicable

423 **Acknowledgments**

424 We would like to thank the measure DHS program for providing the data set.

425

426

427

428

429

430

431

432

433

434



435 **References**

- 436 1. Singh S, Maddow-Zimet I. Facility-based treatment for medical complications resulting  
437 from unsafe pregnancy termination in the developing world, 2012: a review of evidence from 26  
438 countries. *BJOG: An International Journal of Obstetrics & Gynaecology*. 2016;123(9):1489-98.
- 439 2. Say L, Chou D, Gemmill A, Tunçalp Ö, Moller A-B, Daniels J, et al. Global causes of  
440 maternal death: a WHO systematic analysis. *The Lancet Global Health*. 2014;2(6):e323-e33.
- 441 3. Ronsmans C, Graham WJ, group LMSSs. Maternal mortality: who, when, where, and  
442 why. *The lancet*. 2006;368(9542):1189-200.
- 443 4. Singh S, Remez L, Sedgh G, Kwok L, Onda T. Abortion worldwide 2017: uneven  
444 Progress and unequal Access Abortion worldwide 2017: uneven Progress and unequal Access.  
445 2018.
- 446 5. Khan KS, Wojdyla D, Say L, Gülmezoglu AM, Van Look PF. WHO analysis of causes  
447 of maternal death: a systematic review. *The lancet*. 2006;367(9516):1066-74.
- 448 6. Singh S, Fetters T, Gebreselassie H, Abdella A, Gebrehiwot Y, Kumbi S, et al. The  
449 estimated incidence of induced abortion in Ethiopia, 2008. *International perspectives on sexual  
450 and reproductive health*. 2010:16-25.
- 451 7. Singh S, editor *The global magnitude and consequences of unsafe abortion*. Gutmacher  
452 Institute Regional meeting on Post-abortion Care Alexandria, Egypt; 2010.
- 453 8. Olukoya A, Kaya A, Ferguson B, AbouZahr C. Unsafe abortion in adolescents.  
454 *International Journal of Gynecology & Obstetrics*. 2001;75(2):137-47.
- 455 9. Klima CS. Unintended pregnancy: consequences and solutions for a worldwide problem.  
456 *Journal of Nurse-Midwifery*. 1998;43(6):483-91.
- 457 10. Sedgh G, Bearak J, Singh S, Bankole A, Popinchalk A, Ganatra B, et al. Abortion  
458 incidence between 1990 and 2014: global, regional, and subregional levels and trends. *The  
459 Lancet*. 2016;388(10041):258-67.
- 460 11. Grimes DA, Benson J, Singh S, Romero M, Ganatra B, Okonofua FE, et al. Unsafe  
461 abortion: the preventable pandemic. *The lancet*. 2006;368(9550):1908-19.
- 462 12. Sedgh G, Singh S, Shah IH, Åhman E, Henshaw SK, Bankole A. Induced abortion:  
463 incidence and trends worldwide from 1995 to 2008. *The Lancet*. 2012;379(9816):625-32.

- 464 13. Henshaw SK. Induced abortion: a worldwide perspective. *Family Planning Perspectives*.  
465 1986;18(6):250-4.
- 466 14. Okonofua FE, Onwudiegwu U, Odunsi O. Illegal induced abortion: a study of 74 cases in  
467 Ile-Ife, Nigeria. *Tropical Doctor*. 1992;22(2):75-8.
- 468 15. Dixon-Mueller R. Abortion policy and women's health in developing countries.  
469 *International Journal of Health Services*. 1990;20(2):297-314.
- 470 16. Singh K, Ratnam S. The influence of abortion legislation on maternal mortality.  
471 *International Journal of Gynecology & Obstetrics*. 1998;63:S123-S9.
- 472 17. 2016. CSACEaI. Ethiopia Demographic and Health Survey 2016. Addis Ababa, Ethiopia,  
473 and Rockville, Maryland, USA: CSA and ICF. 2016.
- 474 18. Tesfaye G, Hambisa MT, Semahegn A. Induced abortion and associated factors in health  
475 facilities of Guraghe zone, southern Ethiopia. *Journal of pregnancy*. 2014;2014.
- 476 19. Powell-Griner E, Trent K. Sociodemographic determinants of abortion in the United  
477 States. *Demography*. 1987;24(4):553-61.
- 478 20. Misago C, Fonseca W, Correia L, Fernandes LM, Campbell O. Determinants of abortion  
479 among women admitted to hospitals in Fortaleza, North Eastern Brazil. *International journal of*  
480 *epidemiology*. 1998;27(5):833-9.
- 481 21. Bose S, Trent K. Socio-demographic determinants of abortion in India: a north-south  
482 comparison. *Journal of biosocial science*. 2006;38(2):261-82.
- 483 22. Filippi V, Ronsmans C, Campbell OM, Graham WJ, Mills A, Borghi J, et al. Maternal  
484 health in poor countries: the broader context and a call for action. *The Lancet*.  
485 2006;368(9546):1535-41.
- 486 23. Samandari G, Wolf M, Basnett I, Hyman A, Andersen K. Implementation of legal  
487 abortion in Nepal: a model for rapid scale-up of high-quality care. *Reproductive health*.  
488 2012;9(1):7.
- 489 24. Parkhurst JO, Penn-Kekana L, Blaauw D, Balabanova D, Danishevski K, Rahman SA, et  
490 al. Health systems factors influencing maternal health services: a four-country comparison.  
491 *Health policy*. 2005;73(2):127-38.
- 492 25. Martins-Melo FR, Lima MdS, Alencar CH, Ramos Jr AN, Carvalho FHC, Machado  
493 MMT, et al. Temporal trends and spatial distribution of unsafe abortion in Brazil, 1996-2012.  
494 *Revista de saude publica*. 2014;48:508-20.

- 495 26. Ba-Thike K. Abortion: a public health problem in Myanmar. *Reproductive Health*  
496 *Matters*. 1997;5(9):94-100.
- 497 27. Organization WH. Evaluating the quality of care for severe pregnancy complications: the  
498 WHO near-miss approach for maternal health. 2011.
- 499 28. Central statistical agency(CSA) I. Ethiopian Demographic and Health survey. Addis  
500 Abeba: Addis Ababa, Ethiopia, and Rockville, Maryland, USA: CSA and ICF, 2016.
- 501 29. Adugna A. Health Institutions and Services. Addis Abeba: July 2014.
- 502 30. ICF CSACEa. Ethiopia Demographic and Health Survey 2016 Addis Ababa, Ethiopia,  
503 and Rockville , maryland, USA: CSA and ICF. 2016.
- 504 31. Waldhör T. The spatial autocorrelation coefficient Moran's I under heteroscedasticity.  
505 *Statistics in Medicine*. 1996;15(7-9):887-92.
- 506 32. Tsai P-J, Lin M-L, Chu C-M, Perng C-H. Spatial autocorrelation analysis of health care  
507 hotspots in Taiwan in 2006. *BMC Public Health*. 2009;9(1):464.
- 508 33. Bhunia GS, Shit PK, Maiti R. Comparison of GIS-based interpolation methods for spatial  
509 distribution of soil organic carbon (SOC). *Journal of the Saudi Society of Agricultural Sciences*.  
510 2018;17(2):114-26.
- 511 34. Kulldorff M. SaTScan™ user guide. Boston; 2006.
- 512 35. Abdella A. Maternal mortality trend in Ethiopia. *Ethiopian Journal of Health*  
513 *Development*. 2010;24(1).
- 514 36. Dickson KS, Adde KS, Ahinkorah BO. Socio-economic determinants of abortion among  
515 women in Mozambique and Ghana: evidence from demographic and health survey. *Archives of*  
516 *Public Health*. 2018;76(1):37.
- 517 37. Senbeto E, Alene GD, Abesno N, Yeneneh H. Prevalence and associated risk factoprs of  
518 Induced Abortion in Northwet Ethiopia. *Ethiopian Journal of health development*.  
519 2005;19(1):37-44.
- 520 38. Pallikadavath S, Stones RW. Maternal and social factors associated with abortion in  
521 India: a population-based study. *International Family Planning Perspectives*. 2006:120-5.
- 522 39. Gelaye AA, Taye KN, Mekonen T. Magnitude and risk factors of abortion among regular  
523 female students in Wolaita Sodo University, Ethiopia. *BMC women's health*. 2014;14(1):50.

- 524 40. Kongsri S, Limwattananon S, Sirilak S, Prakongsai P, Tangcharoensathien V. Equity of  
525 access to and utilization of reproductive health services in Thailand: national Reproductive  
526 Health Survey data, 2006 and 2009. *Reproductive Health Matters*. 2011;19(37):86-97.
- 527 41. Pearson TA, Lewis C. Rural epidemiology: insights from a rural population laboratory.  
528 *American journal of epidemiology*. 1998;148(10):949-57.
- 529 42. Andersen A-MN, Wohlfahrt J, Christens P, Olsen J, Melbye M. Maternal age and fetal  
530 loss: population based register linkage study. *Bmj*. 2000;320(7251):1708-12.
- 531 43. Mannino DM, Thorn D, Swensen A, Holguin F. Prevalence and outcomes of diabetes,  
532 hypertension and cardiovascular disease in COPD. *European Respiratory Journal*.  
533 2008;32(4):962-9.
- 534 44. Assessment PR. Down syndrome: prenatal risk assessment and diagnosis. *Am Fam*  
535 *Physician*. 2000;62(4):825-32.
- 536 45. Cook RJ, Dickens BM. Reducing stigma in reproductive health. *International Journal of*  
537 *Gynecology & Obstetrics*. 2014;125(1):89-92.
- 538 46. Pinter B, Hakim M, Seidman DS, Kubba A, Kishen M, Di Carlo C. Religion and family  
539 planning. *The European Journal of Contraception & Reproductive Health Care*. 2016;21(6):486-  
540 95.
- 541 47. Sundaram A, Juarez F, Bankole A, Singh S. Factors associated with abortion-seeking and  
542 obtaining a safe abortion in Ghana. *Studies in Family Planning*. 2012;43(4):273-86.
- 543 48. Mehata S, Menzel J, Bhattarai N, Sharma SK, Shah M, Pearson E, et al. Factors  
544 associated with induced abortion in Nepal: data from a nationally representative population-  
545 based cross-sectional survey. *Reproductive health*. 2019;16(1):68.

546

547

548

549 Figure legends

550 **Figure 1:** Map of the study area (source: CSA, 2013)

551 **Figure 2:** The regional prevalence of abortion among reproductive age women in Ethiopia, 2016  
552 (source: CSA, 2013)

553 **Figure 3:** The spatial distribution of abortion in Ethiopia, 2016 (source: CSA, 2013)

554 **Figure 4:** The Global spatial autocorrelation of abortion in Ethiopia, 2016 (source: CSA, 2013)

555 **Figure 5:** The Hotspot analysis of abortion in Ethiopia, 2016 (source: CSA, 2013)

556 **Figure 6:** The Kriging interpolation of abortion in Ethiopia, 2016 (source: CSA, 2013)

557 **Figure 7:** The SaTScan analysis of abortion in Ethiopia, 2016 (source: CSA, 2013)

558 Table 1: Socio-demographic characteristics of respondents in Ethiopia, 2016 (N=12,378).

| Variables                          | Weighted frequency(N) | Percent (%) |
|------------------------------------|-----------------------|-------------|
| <b>Residence</b>                   |                       |             |
| Urban                              | 1,330                 | 11.0        |
| Rural                              | 11,048                | 89.0        |
| <b>Region</b>                      |                       |             |
| Tigray                             | 790                   | 6.4         |
| Afar                               | 131                   | 1.1         |
| Amhara                             | 2,300                 | 18.6        |
| Oromia                             | 5,457                 | 44.1        |
| Somali                             | 587                   | 4.7         |
| Ben-Gumuz                          | 138                   | 1.1         |
| Gambella                           | 2,601                 | 21.0        |
| Harari                             | 29                    | 0.2         |
| Addis Ababa                        | 262                   | 2.1         |
| Dire Dawa                          | 52                    | 0.4         |
| <b>Maternal age (in years)</b>     |                       |             |
| 15-19                              | 380                   | 3.0         |
| 20-24                              | 2,223                 | 18.0        |
| 25-29                              | 3,736                 | 30.2        |
| 30-34                              | 2,872                 | 23.2        |
| 35-39                              | 2,002                 | 16.2        |
| 40-44                              | 873                   | 7.0         |
| 45-49                              | 293                   | 2.4         |
| <b>Maternal educational status</b> |                       |             |
| No education                       | 8,267                 | 66.8        |
| Primary                            | 3,261                 | 26.3        |
| Secondary                          | 555                   | 4.5         |
| Higher                             | 296                   | 2.4         |
| <b>Religion</b>                    |                       |             |

|                          |        |      |
|--------------------------|--------|------|
| Orthodox                 | 4,210  | 34.0 |
| Muslim                   | 5,102  | 41.2 |
| Catholic                 | 113    | 0.9  |
| Protestant               | 21.5   | 21.5 |
| Others*                  | 293    | 2.4  |
| <b>Husband education</b> |        |      |
| No education             | 5,682  | 45.9 |
| Primary                  | 4,572  | 36.9 |
| Secondary                | 868    | 7.0  |
| Higher                   | 1,257  | 10.2 |
| <b>Marital status</b>    |        |      |
| Never married            | 65     | 0.5  |
| Married                  | 11,595 | 93.7 |
| Living with partner      | 137    | 1.1  |
| Widowed                  | 145    | 1.2  |
| Divorced                 | 311    | 2.5  |
| Separated                | 127    | 1.0  |

Keys: \*= Traditional religious followers

559

560

561

562

563

564

565

566

567

568 **Table 2:** Obstetric and socio-economic characteristics of participants in Ethiopia, 2016.

| <b>Characteristics (N=12,378)</b>           | <b>Weighted frequency (N)</b> | <b>Percentage (%)</b> |
|---------------------------------------------|-------------------------------|-----------------------|
| <b>Wealth status</b>                        |                               |                       |
| Poorest                                     | 2,969                         | 23.9                  |
| Poor                                        | 2,799                         | 22.6                  |
| Middle                                      | 2,565                         | 20.7                  |
| Richer                                      | 2,275                         | 18.4                  |
| Richest                                     | 1,770                         | 14.3                  |
| <b>Frequency of listening the radio</b>     |                               |                       |
| Not at all                                  | 9,111                         | 73.6                  |
| Less than once a week                       | 1,624                         | 13.2                  |
| At least once a week                        | 1,643                         | 13.3                  |
| <b>Frequency of watching the television</b> |                               |                       |
| Not at all                                  | 10,163                        | 82.1                  |
| least than once a week                      | 1,233                         | 10.0                  |
| At least once a week                        | 983                           | 7.9                   |
| <b>Occupational status</b>                  |                               |                       |
| Unemployed                                  | 8,740                         | 70.6                  |
| Employed                                    | 3,638                         | 29.4                  |
| <b>Birth history</b>                        |                               |                       |
| No birth                                    | 1,479                         | 12.0                  |
| One birth                                   | 1,893                         | 15.3                  |
| Two births                                  | 1,869                         | 15.1                  |
| Three births                                | 1,642                         | 13.2                  |
| Four and above births                       | 5,495                         | 44.4                  |
| <b>Preceding birth interval</b>             |                               |                       |
| Less than 24 month                          | 2,353                         | 23.4                  |
| ≥ 24 months                                 | 7,706                         | 76.6                  |
| <b>Terminated pregnancy (abortion)</b>      |                               |                       |



|                       |        |      |
|-----------------------|--------|------|
| No                    | 11,273 | 91.1 |
| Yes                   | 1,103  | 8.9  |
| <b>Smoking status</b> |        |      |
| Yes                   | 12,285 | 99.2 |
| No                    | 93     | 0.8  |

---

569

570

571

572

573

574

575

576

577

578

579

580

581

582

583

584

585

586 Table 3: Significant spatial clusters of abortion among women in Ethiopia, 2016.

| clusters | Enumeration areas(EAs)/<br>clusters detected                                                                                                                                             | Coordinates/radius                           | Population | Cases | RR   | LLR  | P-value |
|----------|------------------------------------------------------------------------------------------------------------------------------------------------------------------------------------------|----------------------------------------------|------------|-------|------|------|---------|
| 1        | 84, 45, 81, 590, 481, 461,<br>400, 636, 597, 89, 479, 604,<br>156, 355, 598, 584, 404, 226,<br>579                                                                                       | (14.175601 N,<br>38.891649 E) /<br>62.42 km  | 327        | 70    | 2.63 | 26.6 | <0.001  |
| 2        | 452, 472, 286, 289, 123                                                                                                                                                                  | (7.410925 N,<br>40.475707 E) /<br>85.79 km   | 125        | 27    | 2.58 | 10.2 | 0.01    |
| 3        | 92                                                                                                                                                                                       | (6.708449 N,<br>44.273542 E) /<br>0 km       | 34         | 12    | 4.19 | 9.5  | 0.03    |
| 4        | 510, 267, 572, 10, 423, 350,<br>229, 482, 460, 206, 176, 531,<br>218, 310,617, 120, 637, 517,<br>112, 201, 274, 463, 144, 464,<br>532, 91, 369, 170, 11, 153,<br>287, 339, 626, 107, 247 | (10.160658 N,<br>38.634847 E) /<br>125.60 km | 412        | 61    | 1.79 | 9.2  | 0.04    |
| 5        | 50, 342, 86, 21, 503, 450,<br>574, 182, 505, 398                                                                                                                                         | (5.546952 N,<br>37.666334 E) /<br>88.77 km   | 267        | 42    | 1.89 | 7.5  | 0.171   |
| 6        | 276                                                                                                                                                                                      | (10.717422 N,<br>40.344525 E) /<br>0 km      | 25         | 9     | 4.26 | 7.3  | 0.218   |
| 7        | 564, 39, 230, 51                                                                                                                                                                         | (9.555410 N,<br>40.326165 E) /<br>34.04 km   | 61         | 15    | 2.92 | 7.08 | 0.245   |

587

588

589 Table 4: Model comparison between standard logistic regression and mixed effect logistic  
590 regression.

| Model comparison                       | AIC     | BIC     | Deviance |
|----------------------------------------|---------|---------|----------|
| Logistic regression model              | 6856.17 | 7077.95 | 6796.09  |
| Mixed effect logistic regression model | 6622.02 | 6851.19 | 6560.02  |

591

592

593

594

595

596

597

598

599

600

601

602

603

604

605

606

607 Table 5; Bi-variable and Multivariable mixed effect logistic regression analysis of determinants  
 608 with Abortion among reproductive age women in Ethiopia from January 18 to June 27, 2016.

| Variable                  | Terminated pregnancy |     | COR (95% CI)      | AOR (95% CI)        |
|---------------------------|----------------------|-----|-------------------|---------------------|
|                           | No                   | Yes |                   |                     |
| <b>Residence</b>          |                      |     |                   |                     |
| Urban                     | 1,983                | 130 | 1                 | 1                   |
| Rural                     | 8,989                | 897 | 2.28 (1.70, 3.08) | 4.96 (3.42, 7.18)** |
| <b>Age</b>                |                      |     |                   |                     |
| 15-19                     | 390                  | 18  | 1                 | 1                   |
| 20-24                     | 2,211                | 124 | 1.17 (0.69, 1.98) | 1.27 (0.74, 2.19)   |
| 25-29                     | 3,280                | 282 | 1.79 (1.08, 2.97) | 2.20 (1.27, 3.80)** |
| 30-34                     | 2,443                | 279 | 2.51 (1.51, 4.16) | 3.23 (1.82, 5.71)** |
| 35-39                     | 1,758                | 192 | 2.29 (1.37, 3.82) | 3.01 (1.67, 5.42)** |
| 40-44                     | 670                  | 107 | 3.51 (2.05, 6.00) | 4.57 (2.47, 8.46)** |
| 45-49                     | 220                  | 25  | 2.36 (1.22, 4.55) | 3.12 (1.52, 6.44)** |
| <b>Wealth status</b>      |                      |     |                   |                     |
| Poorest                   | 4,166                | 387 | 1                 | 1                   |
| Poorer                    | 1,848                | 149 | 0.89 (0.71, 1.12) | 0.85 (0.67, 1.07)   |
| Middle                    | 1,490                | 154 | 1.16 (0.92, 1.46) | 1.07 (0.84, 1.36)   |
| Richer                    | 1,361                | 128 | 1.01 (0.79, 1.30) | 0.91 (0.70, 1.19)   |
| Richest                   | 2,107                | 209 | 1.14 (0.90, 1.44) | 1.72 (1.24, 2.40)*  |
| <b>Educational status</b> |                      |     |                   |                     |
| No education              | 7,158                | 670 | 1                 | 1                   |
| Primary                   | 2,688                | 269 | 1.09 (0.92, 1.29) | 1.36 (1.13, 1.64)** |
| Secondary                 | 740                  | 55  | 0.76 (0.55, 1.04) | 0.98 (0.68, 1.41)   |
| Higher                    | 386                  | 33  | 0.88 (0.58, 1.33) | 0.99(0.62, 1.61)    |
| <b>Religion</b>           |                      |     |                   |                     |

|            |       |     |                   |                     |
|------------|-------|-----|-------------------|---------------------|
| Orthodox   | 3,083 | 354 | 1                 | 1                   |
| Muslim     | 5,647 | 518 | 0.75 (0.61, 0.93) | 0.81 (0.64, 1.01)   |
| catholic   | 75    | 3   | 0.38 (0.11, 1.31) | 0.40 (0.12, 1.39)   |
| Protestant | 1,981 | 136 | 0.59 (0.45, 0.77) | 0.56 (0.42, 0.75)** |
| Others     | 186   | 16  | 0.68 (0.36, 1.28) | 0.66(0.34, 1.26)    |

#### Frequency of listening radio

|                       |       |     |                    |                    |
|-----------------------|-------|-----|--------------------|--------------------|
| Not at all            | 8,456 | 733 | 1                  | 1                  |
| Less than once a week | 1,265 | 147 | 1.40 (1.14, 1.72)* | 1.27 (1.01, 1.60)* |
| At least once a week  | 1,251 | 147 | 1.30 (1.05, 1.60)* | 1.21 (0.96, 1.55)  |

#### Frequency of watching television

|                       |       |     |                   |                    |
|-----------------------|-------|-----|-------------------|--------------------|
| Not at all            | 8,754 | 791 | 1                 | 1                  |
| Less than once a week | 877   | 102 | 1.35 (1.06, 1.73) | 1.25 (0.95, 1.65)  |
| At least once a week  | 1,341 | 134 | 1.19 (0.93, 1.51) | 1.45 (1.04, 2.01)* |

#### Birth history

|                       |       |     |                   |                   |
|-----------------------|-------|-----|-------------------|-------------------|
| zero birth            | 1,416 | 96  | 1                 | 1                 |
| One birth             | 1,822 | 142 | 1.16 (0.87, 1.53) | 0.97 (0.72, 1.31) |
| Two births            | 1,649 | 146 | 1.31 (0.98, 1.73) | 0.92(0.66, 1.27)  |
| Three births          | 1,514 | 130 | 1.32 (0.99, 1.76) | 0.85 (0.60, 1.19) |
| Four and above births | 4,571 | 513 | 1.70 (1.33, 2.16) | 0.85 (0.60, 1.19) |

#### Marital status

|               |        |     |                   |                   |
|---------------|--------|-----|-------------------|-------------------|
| Married       | 10,191 | 967 | 1                 | 1                 |
| Never married | 273    | 28  | 1.11 (0.72, 1.69) | 1.22 (0.78, 1.90) |
| Widowed       | 158    | 8   | 0.62 (0.29, 1.29) | 0.52 (0.24, 1.11) |
| Divorced      | 349    | 24  | 0.74 (0.48, 1.15) | 0.78 (0.49, 1.23) |

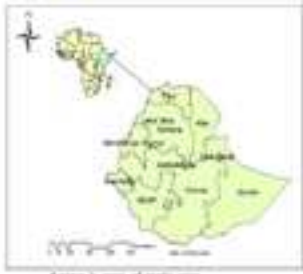

Figure 1. Map of India.

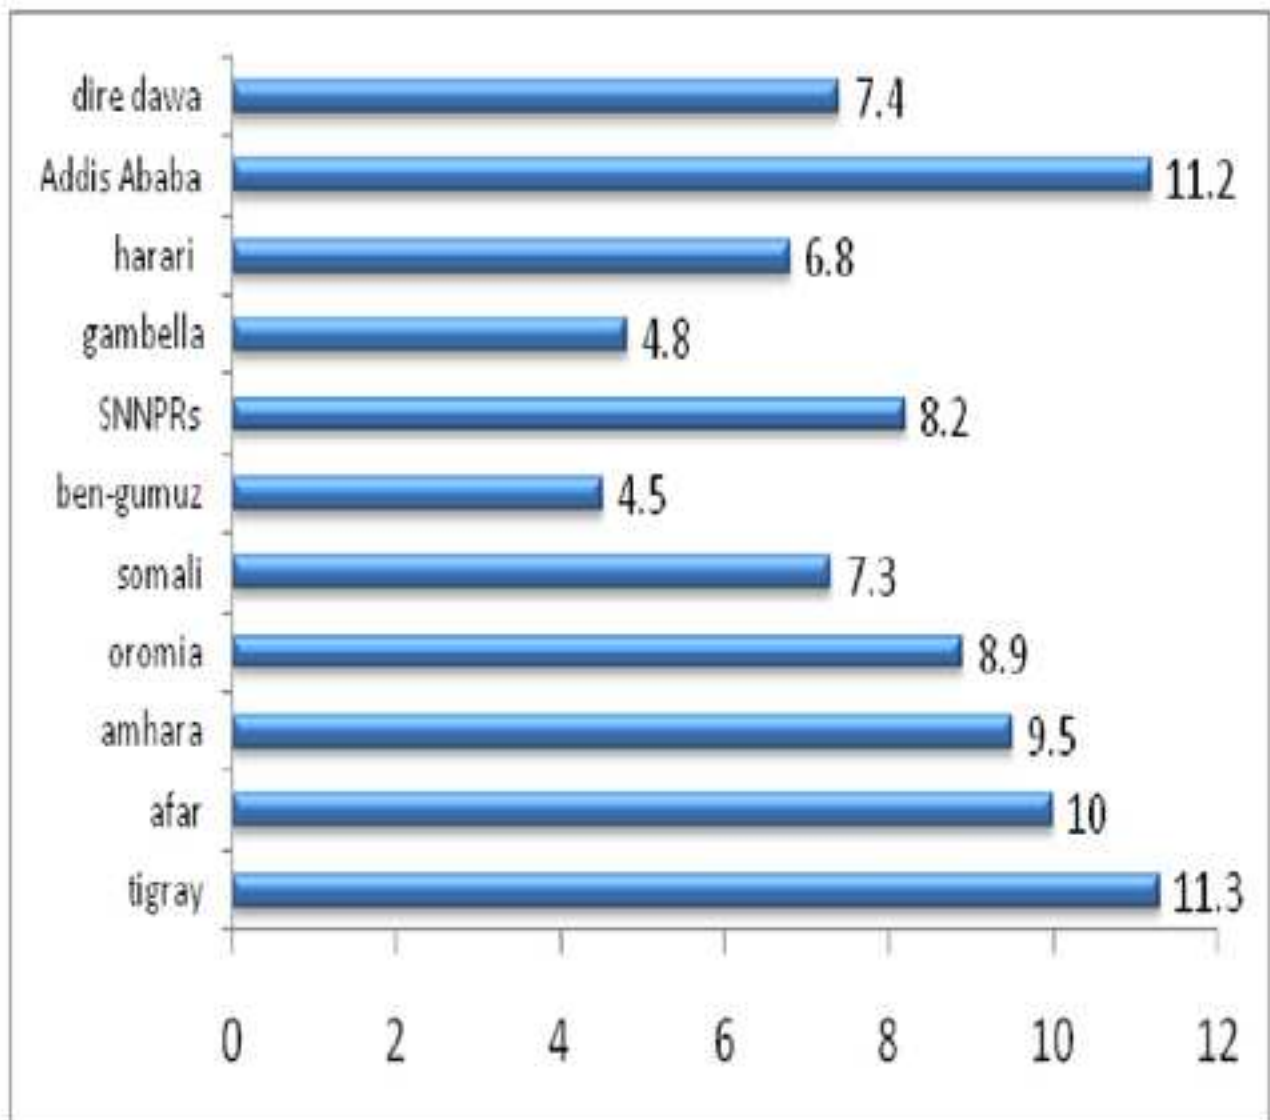

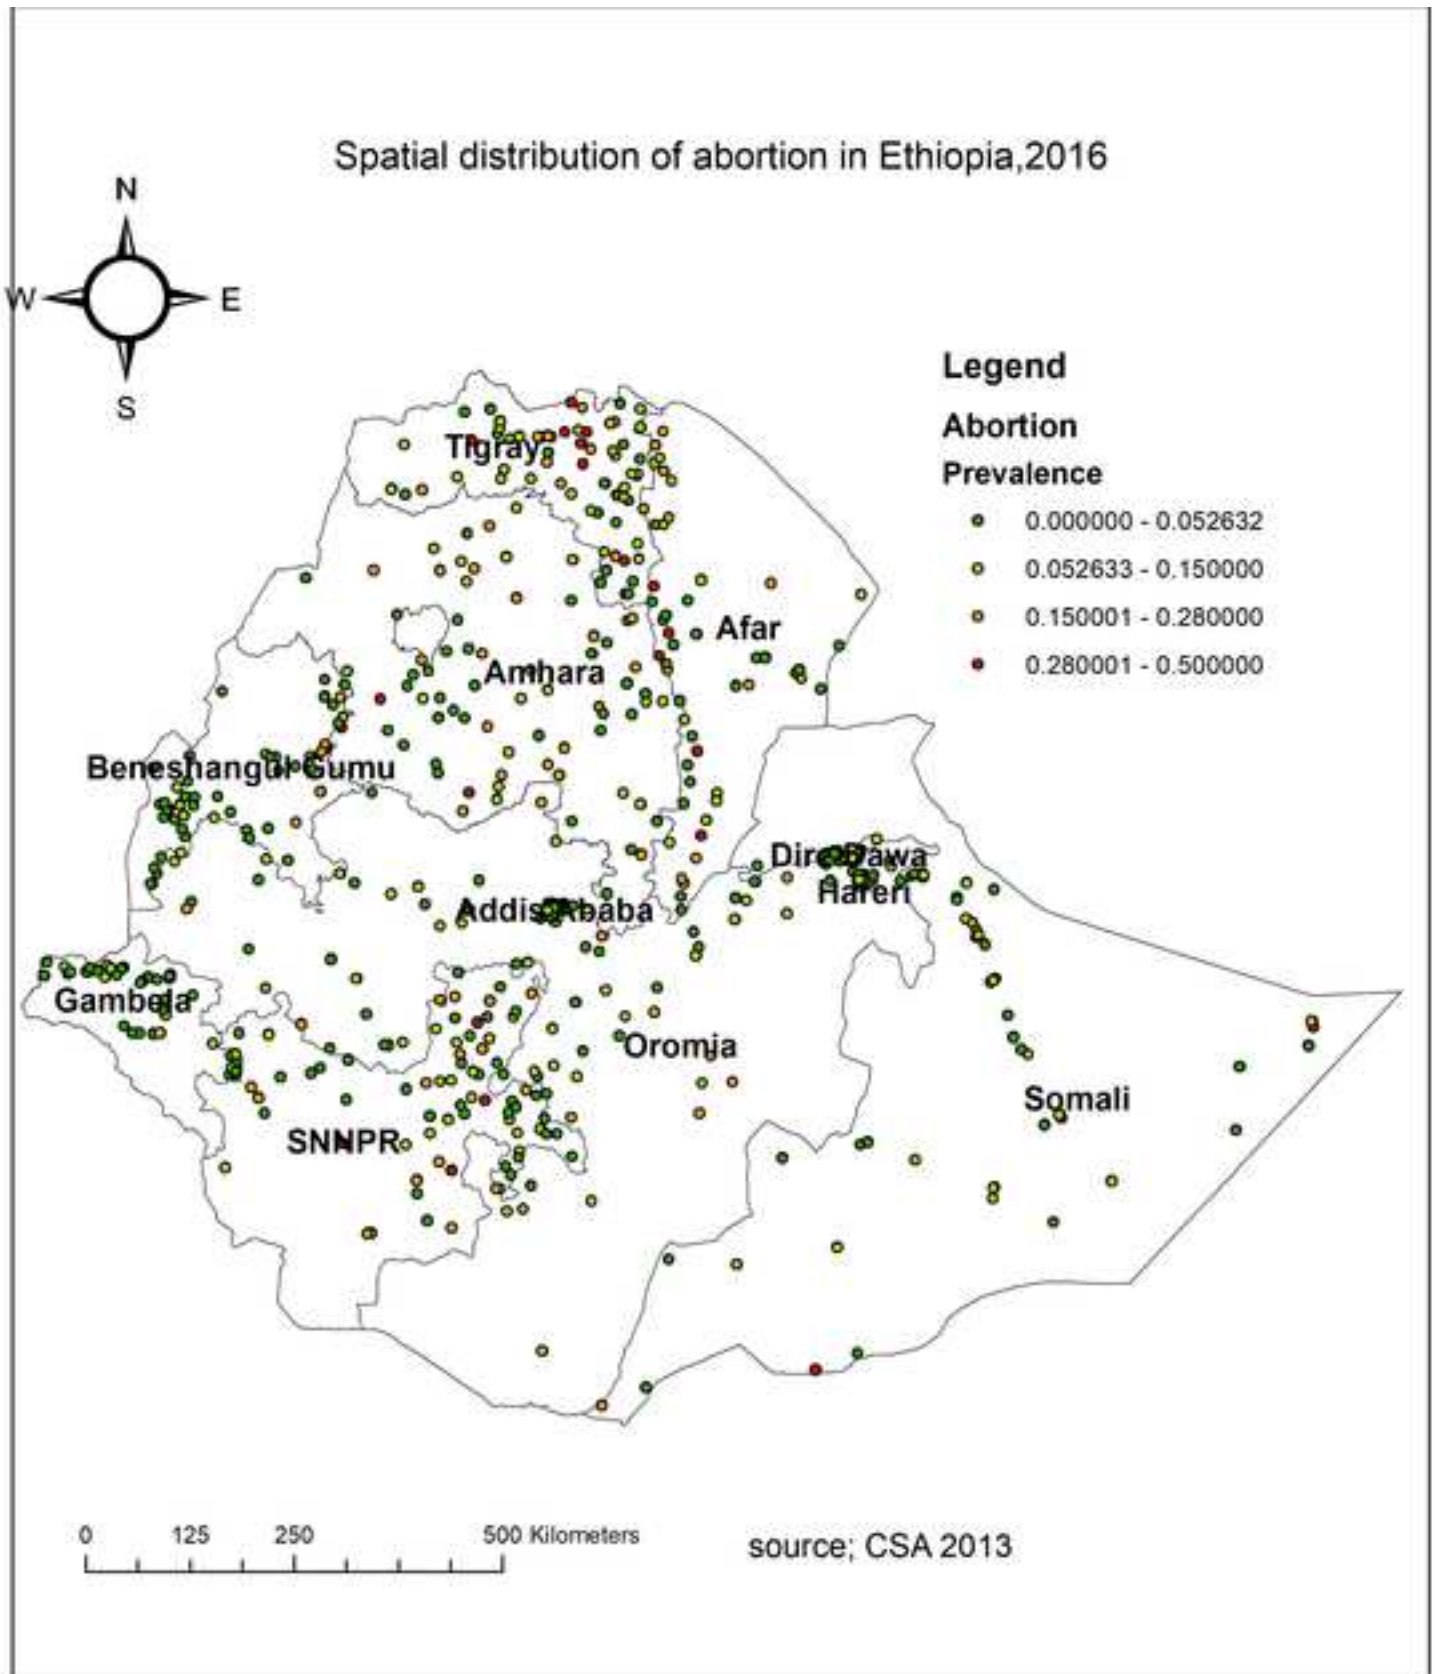



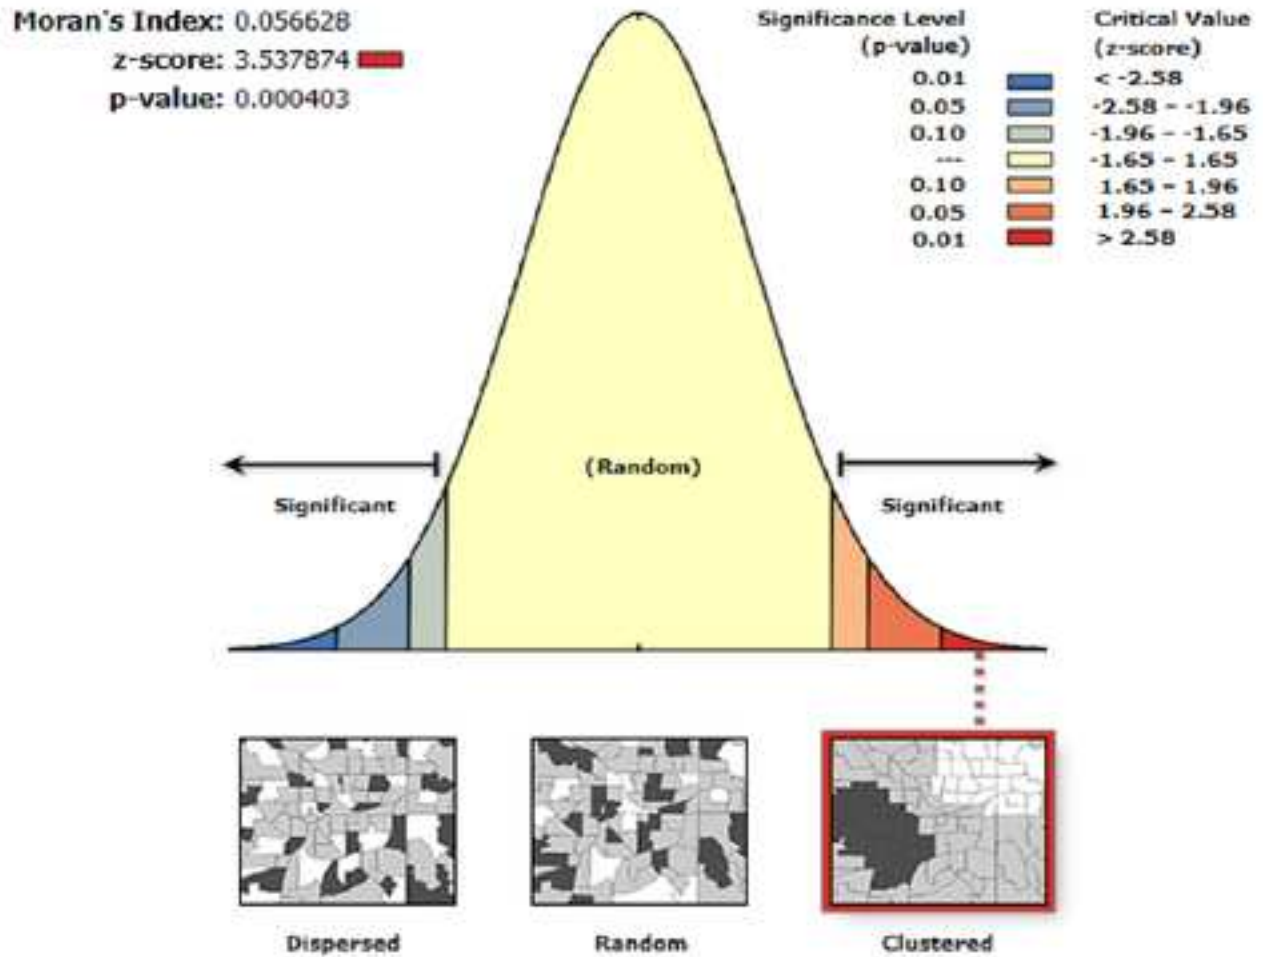

Given the z-score of 3.53787386448, there is a less than 1% likelihood that this clustered pattern could be the result of random chance.

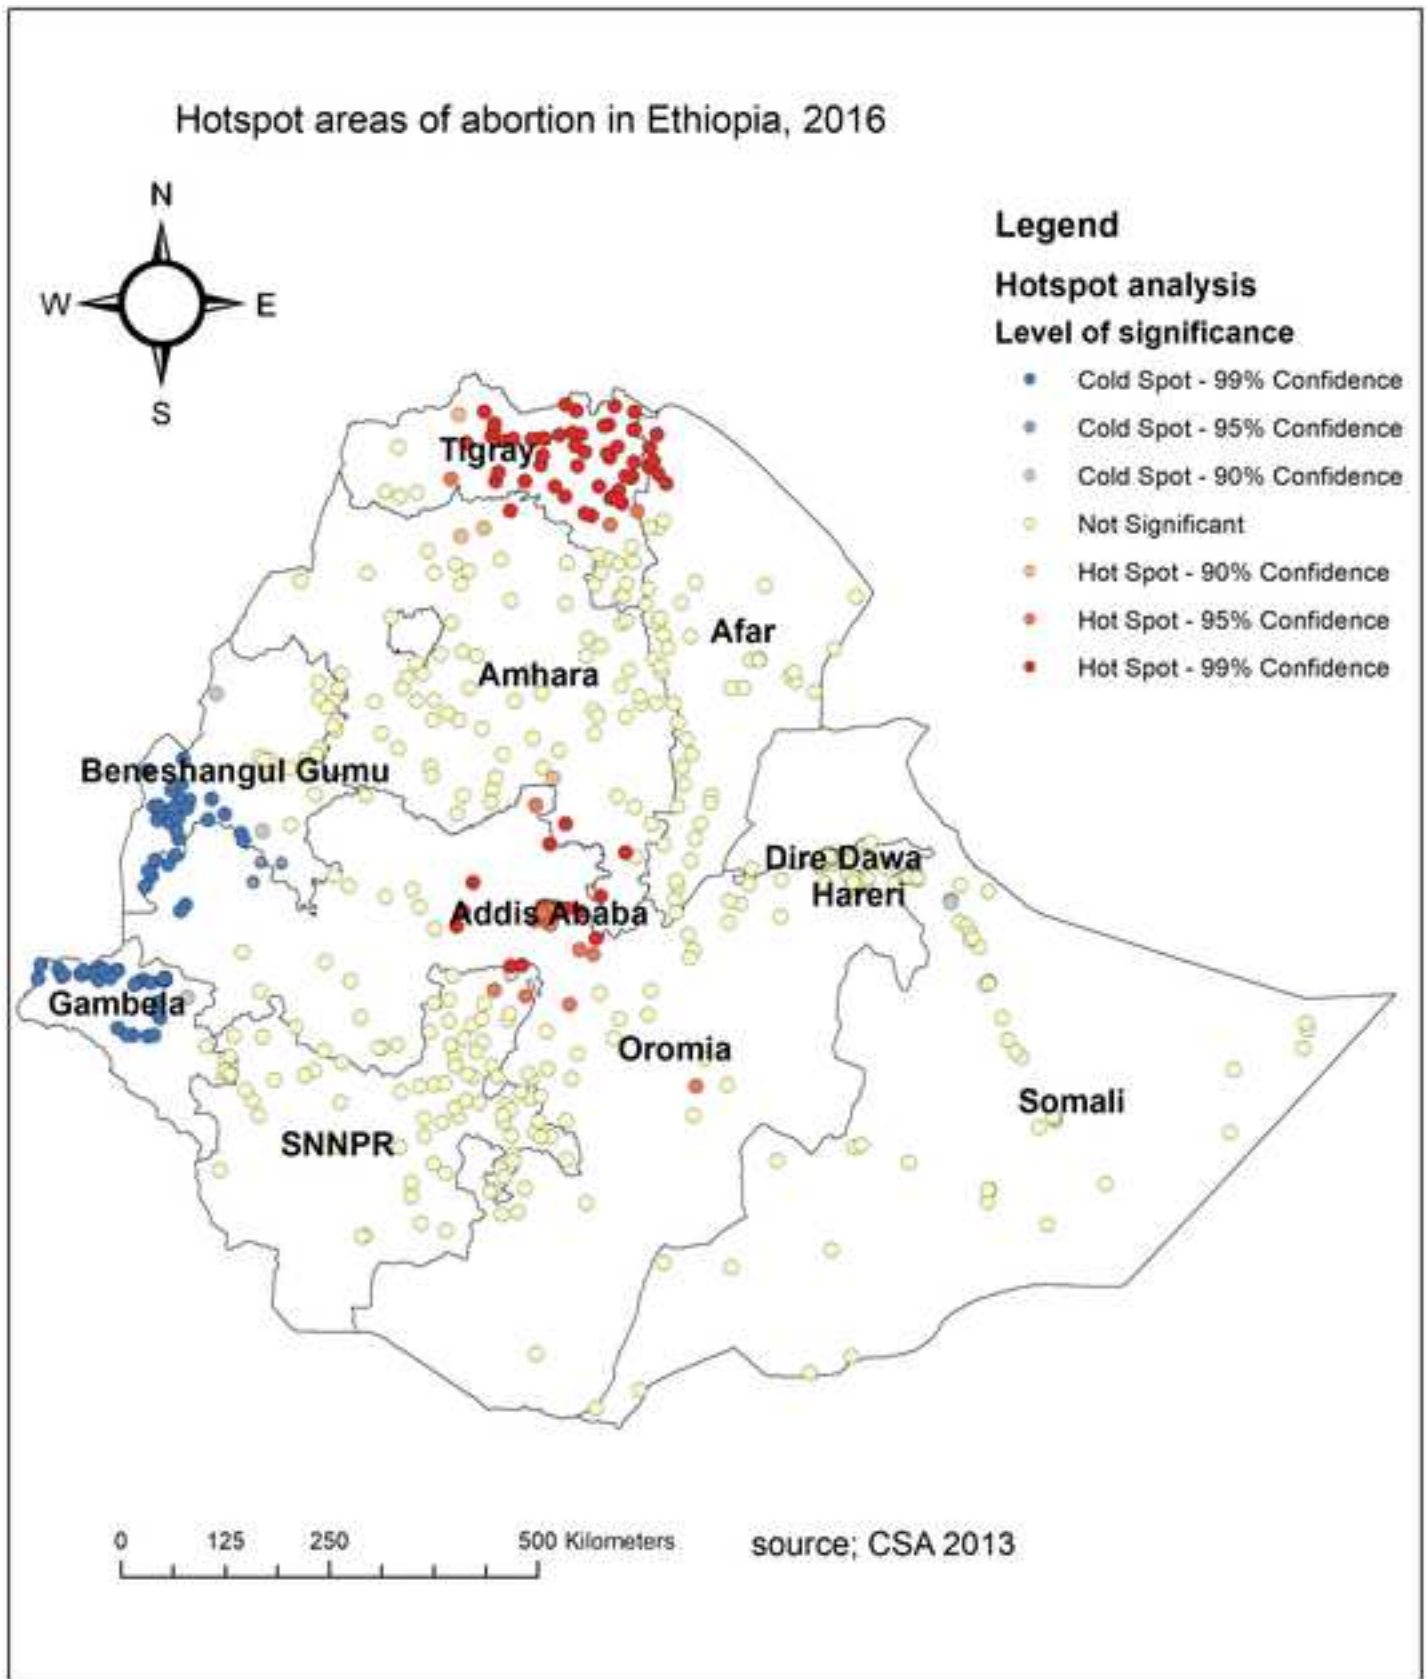

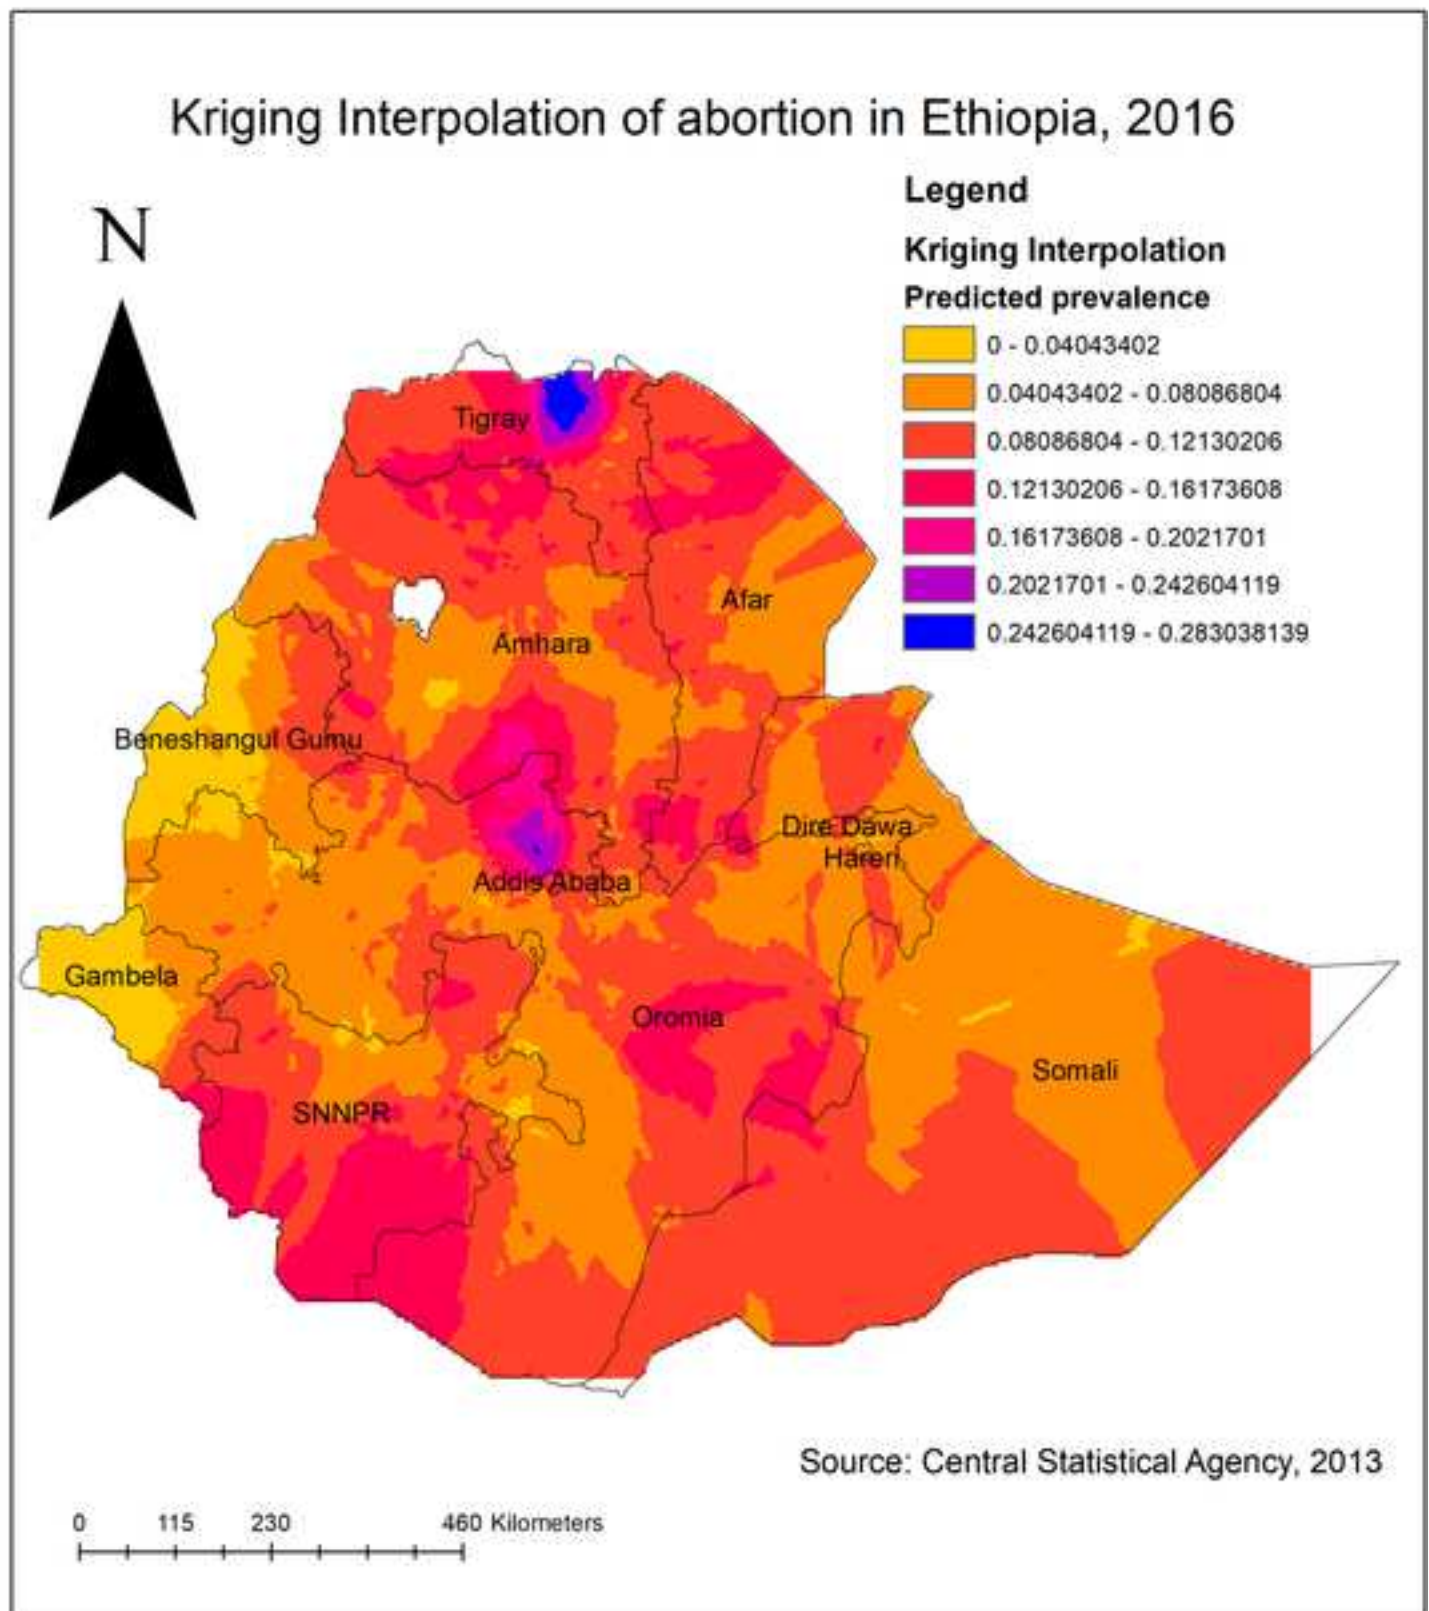

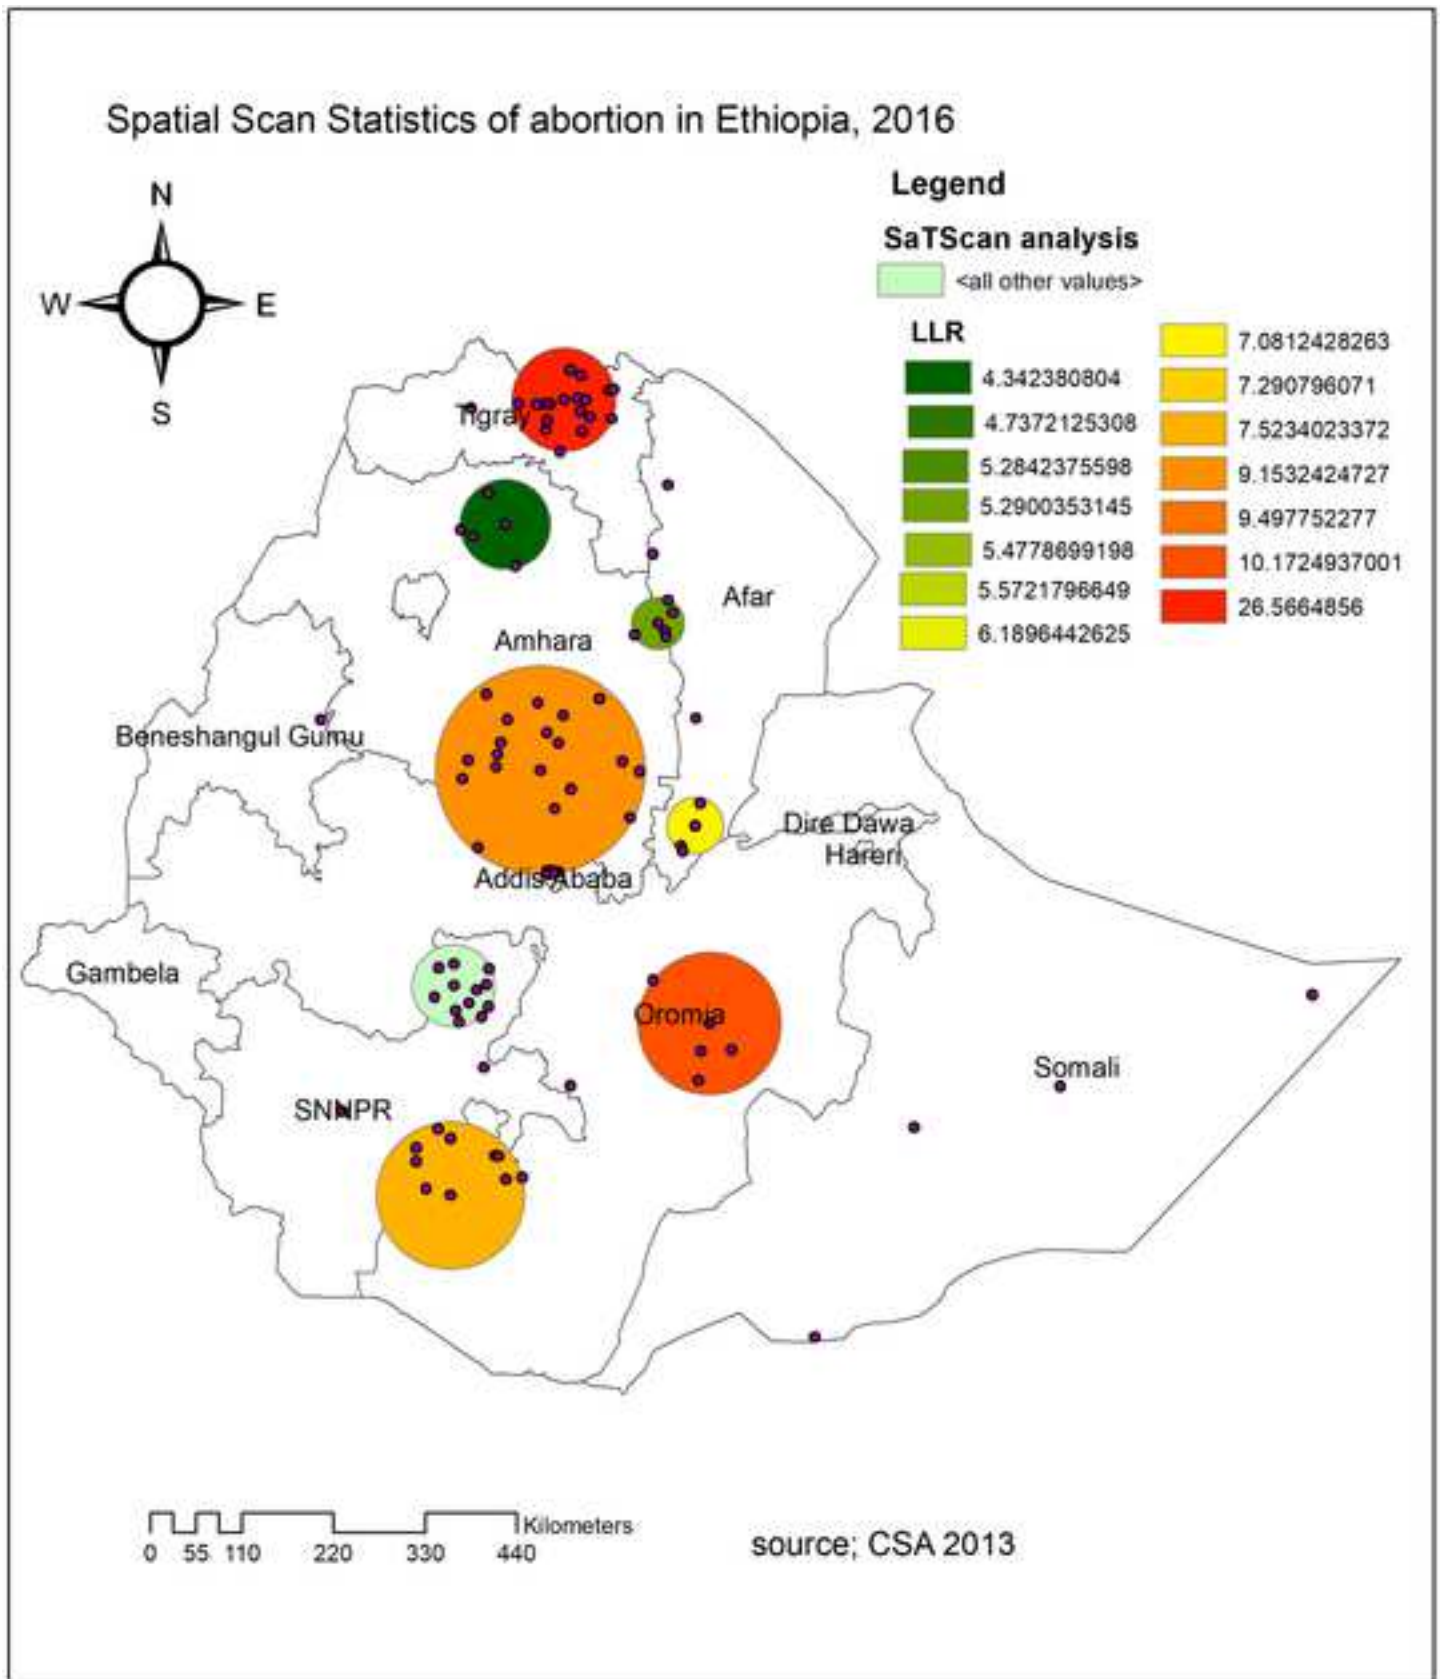

Supplement: pone.0235382.s001.pdf [file pone.0235382.s001.pdf]
